## **Title: Evaluating the utility of tumour mutational signatures for identifying hereditary colorectal cancer and polyposis syndrome carriers**

Peter Georgeson<sup>1,2</sup>, Bernard J. Pope<sup>1,2,3</sup>, Christophe Rosty<sup>1,2,4,5</sup>, Mark Clendenning<sup>1,2</sup>, Romy Walker<sup>1,2</sup>, Khalid Mahmood<sup>1,2,3</sup>, Jihoon E. Joo<sup>1,2</sup>, Ryan Hutchinson<sup>1,2</sup>, Susan Preston<sup>1,2</sup>, Julia Como<sup>1,2</sup>, Sharelle Joseland<sup>1,2</sup>, Aung K. Win<sup>6,8</sup>, Finlay A. Macrae<sup>6,7</sup>, John L. Hopper<sup>8</sup>, Mark A. Jenkins<sup>2,8</sup>, Ingrid M. Winship<sup>6,9</sup>, Daniel D. Buchanan<sup>1,2,6</sup>

<sup>1</sup> Colorectal Oncogenomics Group, Department of Clinical Pathology, The University of Melbourne, Parkville, Victoria, Australia

<sup>2</sup> University of Melbourne Centre for Cancer Research, Victorian Comprehensive Cancer Centre, Parkville, Victoria, Australia

<sup>3</sup> Melbourne Bioinformatics, The University of Melbourne, Carlton, Victoria, Australia

<sup>4</sup> Envoi Pathology, Brisbane, Queensland, Australia

<sup>5</sup> University of Queensland, School of Medicine, Herston, Queensland, Australia

<sup>6</sup> Genomic Medicine and Family Cancer Clinic, Royal Melbourne Hospital, Parkville, Victoria, Australia

<sup>7</sup> Colorectal Medicine and Genetics, The Royal Melbourne Hospital, Parkville, Victoria, Australia

<sup>8</sup> Centre for Epidemiology and Biostatistics, The University of Melbourne, Carlton, Victoria, Australia

<sup>9</sup> Department of Medicine, The University of Melbourne, Parkville, Victoria, Australia

### **Correspondence:**

Associate Professor Daniel Buchanan  
Colorectal Oncogenomics Group  
Department of Clinical Pathology  
The University of Melbourne  
Victorian Comprehensive Cancer Centre  
305 Grattan Street  
Parkville, Victoria, 3010 Australia  
Ph: +61 385597004  
Email: [daniel.buchanan@unimelb.edu.au](mailto:daniel.buchanan@unimelb.edu.au)

**Word count:** 4003

**Tables:** 2

**Figures:** 7

**Keywords:** tumour mutational signatures, colorectal cancer, hereditary colorectal cancer, Lynch syndrome, DNA mismatch repair, *MUTYH*, *NTHL1*.

**Abbreviations:** area under the curve (AUC), Australasian Colorectal Cancer Family Registry (ACCFR), base excision repair (BER), colon adenocarcinoma (COAD), colorectal cancers

(CRCs), depth of coverage (DP), formalin-fixed paraffin embedded (FFPE), Genetics of Colonic Polyposis Study (GCPS), indel (ID), Fisher's linear discriminant (LD), microsatellite instability (MSI), mismatch repair (MMR), MMR-deficient (MMRd), MMR-proficient (MMRp), *MUTYH*-associated polyposis (MAP), *NTHL1*-associated polyposis (NAP), pathogenic variant (PV), percentage points (pp), receiver operating curve (ROC), single base substitution (SBS), The Cancer Genome Atlas (TCGA), tumour mutational burden (TMB), tumour mutational signatures (TMS), variant allele fraction (VAF), variants of uncertain clinical significance (VUS), whole exome sequencing (WES)

## **ABSTRACT (250 words)**

**Objective:** Germline pathogenic variants (PVs) in the DNA mismatch repair (MMR) genes and the base excision repair genes *NTHL1* and *MUTYH* underlie hereditary CRC and polyposis syndromes. We evaluate the robustness and discriminatory potential of tumour mutational signatures in colorectal cancers (CRCs) for identifying germline PV carriers.

**Design:** Whole exome sequencing of FFPE CRC tissue was performed on 14 MMR, 6 biallelic *MUTYH*, and 1 biallelic *NTHL1* PV carrier, 9 sporadic MMR-deficient CRCs (MMRd controls) and 18 sporadic MMR-proficient CRCs (MMRp controls). COSMIC V3 single base substitution (SBS) and indel (ID) mutational signatures were calculated and assessed for their ability to differentiate CRCs that developed in carriers and non-carriers.

**Results:** The combination of mutational signatures SBS18 and SBS36 contributing >23% of the signature profile was able to discriminate biallelic *MUTYH* carriers from MMRp and MMRd control CRCs with >99% confidence. Variant specific signatures SBS18 and SBS36 were identified for *MUTYH* p.Gly396Asp (p=0.015) and *MUTYH* p.Tyr179Cys (p=0.0012), respectively. SBS30 was significantly increased in a CRC from a biallelic *NTHL1* carrier compared with MMRp and MMRd control CRCs. The combination of ID2, ID7, SBS15 and SBS1 could discriminate the 14 MMR PV carrier CRCs from the MMRp control CRCs, however, SBS and ID signatures, alone or in combination, could not provide complete discrimination between CRCs from MMR PV carriers and sporadic MMRd controls.

**Conclusion:** Assessment of SBS and ID signatures can discriminate CRCs from *MUTYH*, *NTHL1* and MMR PV carriers from non-carriers, demonstrating utility as a potential diagnostic and variant classification tool.

## **SIGNIFICANCE OF THE STUDY**

### **What is already known about this subject?**

- Identifying carriers of pathogenic variants (PVs) in moderate/high-risk CRC and polyposis susceptibility genes has clinical relevance for diagnosis, targeted screening and prevention strategies, prognosis, and treatment options, however, challenges still remain in the identification of carriers and the classification of rare variants in these genes.
- Previous studies have identified tumour mutational signatures that result from defective DNA repair including DNA mismatch repair (MMR) deficiency and base excision repair defects, DNA repair mechanisms that underlie the common hereditary CRC and polyposis syndromes.

### **What are the new findings?**

- Single base substitution (SBS)-related mutational signatures derived from whole exome sequencing of FFPE-derived CRC tissue DNA could effectively discriminate CRCs that developed in biallelic *MUTYH* PV carriers and biallelic *NTHL1* PV carriers from CRC-affected non-carriers.
- CRCs that developed in MMR PV carriers (Lynch syndrome) could be effectively differentiated from sporadic MMR-proficient CRC by a combination of SBS and indel (ID) signatures, but they were less effective at discriminating Lynch syndrome-related CRC from sporadic MMR-deficient CRC resulting from *MLH1* gene promoter hypermethylation.
- The SBS and ID mutational signatures associated with hereditary CRC and polyposis syndrome carriers were robust to changes in experimental settings.
- We demonstrate the optimal variant filtering settings for calculating mutational signatures and define stringent thresholds for classifying CRC aetiology as hereditary or non-hereditary.

### **How might it impact on clinical practice in the foreseeable future?**

- Deriving SBS- and ID-related mutational signatures from CRCs can identify carriers of PVs in hereditary CRC and polyposis susceptibility genes.
- The application of mutational signatures will improve the diagnosis of syndromic CRC and aid in variant classification, leading to improved clinical management and CRC prevention.

## INTRODUCTION

Colorectal cancer (CRC) is the third most commonly diagnosed cancer worldwide and is a leading cause of cancer-related morbidity and mortality [1]. Currently, 5-10% of CRCs develop in individuals who carry a pathogenic variant (PV) in a known hereditary CRC and/or polyposis susceptibility gene, including the DNA mismatch repair (MMR) genes (*MLH1*, *MSH2*, *MSH6*, *PMS2*) and the base excision repair (BER) genes *MUTYH* [2] and *NTHL1* [3] (reviewed in [4]). Identifying carriers of PVs in these susceptibility genes has important implications for preventing subsequent primary cancers in the proband [5–7] and for the prevention of CRC in relatives through targeted screening approaches such as colonoscopy with polypectomy [8,9].

Currently, the most common strategy to identify MMR gene PV carriers (Lynch syndrome) starts with testing the tumour for microsatellite instability (MSI) and/or loss of MMR protein expression by immunohistochemistry [10,11]. However, loss of MMR protein expression (MMR-deficiency) in a CRC is not diagnostic for carrying a PV because MMR-deficiency can be caused by epigenetic inactivation of the MMR genes (hypermethylation of the *MLH1* gene promoter) or biallelic somatic mutations of MMR genes [12,13]. Moreover, no tumour-based approach is routinely applied to identify biallelic PV carriers in the *MUTYH* or *NTHL1* genes; currently germline testing is guided by the presence of associated phenotypic features [4], although the phenotype for biallelic *MUTYH* carriers has been shown to be variable, making this approach suboptimal [14]. Consequently, the classification of variants of uncertain clinical significance (VUS) still present challenges [15].

The determination of tumour mutational signatures is an emerging approach that integrates the somatic mutation landscape within a single tumour to identify patterns associated with distinct oncogenic pathways [16–19]. Each signature is derived from compositional changes of single base substitutions (SBS), indels (ID), and doublets. The most recent version of the predominant mutational signature framework published on the COSMIC website defines 95 signatures, of which a proposed aetiology is available for 63 (66%) signatures [20]. To date, seven signatures have been identified that relate to defective DNA repair including MMR (SBS6, SBS15, SBS20, SBS26), and BER defects caused by dysfunctional *NTHL1* (SBS30)[7] and *MUTYH* (SBS18 and SBS36) [21,22]. Therefore, determining signatures

presents a promising new strategy to identify PV carriers and to improve the current classification of rare variants and VUS.

Although mutational signatures show substantial promise in the translational setting, clinical adoption has been limited [23]. In this study, we evaluated the SBS and ID signature landscapes in CRCs caused by germline PVs in the MMR genes or by biallelic PVs in the *MUTYH* and *NTHL1* genes, to test the clinical utility of mutational signatures for predicting PVs in specific genes. We assessed the effect of experimental settings and quantified the discriminatory potential of signatures for identifying PV carriers from non-syndromic CRC.

## MATERIALS AND METHODS

### Study Cohort

CRC-affected individuals recruited to the Genetics of Colonic Polyposis Study (GCPS) [24] or the Australasian Colorectal Cancer Family Registry (ACCFR) [25,26] were selected for analysis in this study if they were carriers of germline PVs in *MLH1*, *MSH2* or *MSH6* or were biallelic or monoallelic carriers of PVs in the *MUTYH* or *NTHL1* genes. A single CRC-affected individual carrying a PV and a VUS in the *MUTYH* gene was also included (sample M12). Tumour MMR status was determined by immunohistochemistry with details of the tumour and germline characterisation undertaken described previously [7,27,28]. Two groups of CRC-affected individuals from the ACCFR [28] were selected as age-matched non-syndromic controls: 1) individuals who developed MMR-proficient (MMRp) CRC without a known germline mutation in a hereditary CRC/polyposis associated gene were included as “MMRp controls” (n=18), and 2) individuals who developed MMRd CRC resulting from somatic *MLH1* gene promoter hypermethylation were included as “MMRd controls” (n=9). In addition, 244 CRC tumours from The Cancer Genome Atlas (TCGA) Colon adenocarcinoma (COAD) study [29] were included as a validation set of non-syndromic CRCs, ranging in their age at CRC diagnosis of 34-90 years (**Supplementary Table 1**). Tumour MSI status [30] and DNA methylation analysis of the *MLH1* gene promoter were used to stratify the TCGA tumours into 218 MMRp (“TCGA MMRp controls”) and 26 MMRd (“TCGA MMRd controls”) cancers (**Supplementary Methods**).

## **Whole Exome Sequencing (WES) and Analysis**

Formalin-Fixed Paraffin Embedded (FFPE) CRC tissues were macrodissected and sequenced as tumour with matching peripheral blood-derived DNA sequenced as germline (**Supplementary Methods**). Somatic single-nucleotide variants and short insertion and deletions (indels) were called with Strelka 2.9.2 (recommended workflow) and used to calculate mutational signatures using the method described by DeconstructSigs [31] from the set of COSMIC version 3 signatures [20] (**Supplementary Methods**). The impact of experimental settings was explored by filtering variants based on depth of coverage (DP) and the variant allele fraction (VAF) in the tumour, then calculating signatures at each filter point. Details of the TCGA analysis are provided in the **Supplementary Methods**.

We assessed the ability of signatures to separate the specific syndromic CRC group from the non-syndromic CRC group using four methods, at each filtering setting, for each relevant signature: 1) Fisher's linear discriminant (LD) [32], or for groups with a single syndromic sample (N01), Grubbs outlier test [33], 2) absolute margin separating the specific syndromic CRC group from non-syndromic groups, 3) the difference in the means of the two groups, and 4) P-values were calculated using a one-sided t-test, or for groups with a single sample (N01), Grubbs outlier test [33] (**Supplementary Methods**).

We fitted the signatures of each group of CRCs to a beta distribution to enable the generation of percentiles for each group. Confidence thresholds that a given measurement belonged to the hereditary CRC syndrome of interest were also calculated. To find the best combination of signatures for identifying each hereditary syndrome, we applied forward selection while maximising the area under the curve (AUC) of the receiver operating curve (ROC) and the margin between the groups, with stringent requirements to reduce the likelihood of overfitting (**Supplementary Methods**).

## **Patient and Public Involvement**

There has been no patient or public involvement in the generation of this research report.

## RESULTS

### Overall Tumour Mutational Signature Results

The 60 CRCs analysed in this study were classified as syndromic CRCs (n=33) and non-syndromic CRC controls (n=27), comprising of 9 MMRd CRCs (mean age at diagnosis±SD 56.8±7.3 years), and 18 MMRp CRCs (44.1±12.4 years) (**Table 1**). The syndromic CRC group were not significantly different in their age at diagnosis compared with the non-syndromic CRCs (48.1±13.0 years versus 48.3±12.5 years, p=0.94) but were significantly younger when compared with the 244 TCGA tumours (66.0±12.6 years, p=5x10<sup>-13</sup>). The characteristics of each individual and their CRC are provided in **Supplementary Table 1** and **Supplementary Table 2**.

**Figure 1** illustrates the calculated SBS and ID signature compositions for each of the 60 CRCs (TCGA tumour SBS and ID signatures are shown in **Supplementary Figure 1**). The SBS-derived signatures that have been previously reported to be associated with BER defects were observed as the dominant signature in 9 out of 10 biallelic *MUTYH* related CRCs (SBS18 and SBS36) and for the single biallelic *NTHL1* related CRC (SBS30) (**Figure 1**). SBS6, SBS15, ID2 and ID7 were the dominant signatures in MMRd CRCs from both Lynch syndrome and *MLH1* methylated tumours (MMRd controls). The signatures observed for each CRC, their proportion and ranking are provided in **Supplementary Table 3**. The signatures associated with hereditary CRC syndromes are shown in **Figure 2**.



**Table 1.** Summary of subtypes of hereditary CRC and polyposis syndromes investigated in this study, including their underlying gene defect, previously reported mutational signature associations and the number of individuals and CRCs tested by WES. Two sources of non-syndromic CRCs were included as control groups comprising CRCs from the ACCFR study and from the TCGA COAD study.

| Syndrome                                 | Defective Gene(s)                                     | DNA repair mechanism | Associated Signatures                                                 | Sub-category                   | Individuals | No. of CRCs | CRC study IDs |
|------------------------------------------|-------------------------------------------------------|----------------------|-----------------------------------------------------------------------|--------------------------------|-------------|-------------|---------------|
| <b>Syndromic CRCs</b>                    |                                                       |                      |                                                                       |                                |             |             |               |
| <i>MUTYH</i> -associated polyposis (MAP) | Biallelic <i>MUTYH</i>                                | Base excision repair | SBS18, SBS36                                                          | Biallelic <i>MUTYH</i> carrier | 6           | 10          | M01-M10       |
|                                          |                                                       |                      |                                                                       | Monoallelic carrier            | 3           | 3           | M11, M13, M14 |
|                                          |                                                       |                      |                                                                       | VUS carrier                    | 1           | 1           | M12           |
| <i>NTHL1</i> -associated polyposis (NAP) | Biallelic <i>NTHL1</i>                                | Base excision repair | SBS30                                                                 | Biallelic <i>NTHL1</i> carrier | 1           | 1           | N01           |
|                                          |                                                       |                      |                                                                       | Monoallelic carrier            | 4           | 4           | N02-N05       |
| Lynch Syndrome                           | <i>MLH1</i> , <i>MSH2</i> , <i>MSH6</i> , <i>PMS2</i> | Mismatch repair      | SBS6, SBS14, SBS15, SBS20, SBS21, SBS26, SBS44, ID2, ID7, DBS7, DBS10 | <i>MLH1</i> carrier            | 7           | 7           | L07-L13       |
|                                          |                                                       |                      |                                                                       | <i>MSH2</i> carrier            | 3           | 3           | L01, L02, L14 |
|                                          |                                                       |                      |                                                                       | <i>MSH6</i> carrier            | 4           | 4           | L03-L06       |
|                                          |                                                       |                      |                                                                       |                                |             |             |               |
| <b>Non-syndromic CRCs</b>                |                                                       |                      |                                                                       |                                |             |             |               |
| Sporadic MMR-deficient CRCs              | <i>MLH1</i> methylation                               | Mismatch repair      |                                                                       | MMRd controls                  | 9           | 9           | K01-K9        |
| Sporadic MMR-proficient CRCs             |                                                       |                      |                                                                       | MMRp controls                  | 18          | 18          | C01-C18       |
| <b>TOTAL</b>                             |                                                       |                      |                                                                       |                                | <b>56</b>   | <b>60</b>   |               |
| <b>TCGA Non-syndromic CRCs</b>           |                                                       |                      |                                                                       |                                |             |             |               |
| Sporadic MMR-deficient CRCs              | <i>MLH1</i> methylation                               | Mismatch repair      |                                                                       | TCGA MMRd controls             | 26          | 26          |               |
| Sporadic MMR-proficient CRCs             |                                                       |                      |                                                                       | TCGA MMRp controls             | 218         | 218         |               |
| <b>TOTAL</b>                             |                                                       |                      |                                                                       |                                | <b>244</b>  | <b>244</b>  |               |

## Identifying a biallelic *MUTYH* carrier mutational signature in CRC

For biallelic *MUTYH* carrier CRCs (M01-M10), only two signatures, SBS18 and SBS36, were significantly enriched when compared with non-*MUTYH* CRCs (mean±SD; 20.6±15.1% v. 0.6±1.7%;  $p=6\times 10^{-12}$  and 25.5±15.6% v. 0.1±0.3%;  $p=2\times 10^{-15}$ , respectively; **Figure 2**). This significant enrichment of SBS18 and SBS36 was also observed when the biallelic *MUTYH* carrier CRCs (M01-M10) were compared with the TCGA tumours (mean±SD; 20.6±15.1% v. 2.8±5.1%;  $p=1\times 10^{-18}$  and 25.5±15.6% v. 0.3±1.2%;  $p=7\times 10^{-66}$ , respectively; **Figure 2**).

The SBS18 and SBS36 mutational signatures differed by the underlying germline *MUTYH* mutation. The CRCs from homozygous or compound heterozygous carriers of the c.536A>G p.Tyr179Cys PV (n=7) showed significantly higher proportions of SBS36 ( $p=0.0012$ ), while the CRCs from homozygous carriers of the c.1187G>A p.Gly396Asp variant (n=3) showed significantly higher proportions of SBS18 ( $p=0.015$ ) (**Figure 3a** and **Figure 3b**). Tumour mutational burden (TMB) was also found to be significantly higher in homozygous or compound heterozygous carriers of the c.536A>G p.Tyr179Cys (15.22±3.65 mutations/Mb) relative to p.Gly396Asp homozygous carriers (6.30±0.52 mutations/Mb;  $p=0.0054$ ).

We investigated the ability of mutational signatures to differentiate CRCs from biallelic *MUTYH* carriers from non-carriers. The combination of SBS18 and SBS36 provided the most effective discrimination of CRCs from biallelic *MUTYH* carriers from all other ACCFR CRCs in the study, achieving an AUC of 1.00, and separation of 9.0 percentage points (the difference between two percentages; pp) between the two groups (**Table 2**). The sum of SBS18 and SBS36 accounted for, on average, almost half of the total signature composition for biallelic *MUTYH* related CRCs (46.1±12.3%; range 18.2% to 57.0%) whereas these signatures had negligible contribution to all other CRCs in the study (ACCFR non-*MUTYH* CRCs: 0.6±1.8%; range 0.0% to 9.2%,  $p=3\times 10^{-30}$ ; TCGA: 3.0±5.3%; range 0.0% to 29.3%,  $p=4\times 10^{-65}$ ; **Figure 3b**).

We found that the robustness of mutational signatures is dependent on different minimum VAF and minimum DP variant filtering settings. A minimum VAF threshold between 0.05 and 0.20 (**Figure 4a** and **Figure 4b**), and a minimum DP threshold of at least 30 (**Figure 4c**

and **Figure 4d**) effectively separated biallelic *MUTYH* carrier and non-*MUTYH* carrier CRC groups. A minimum VAF of 0.1 and minimum DP of 50 were selected to maximise the capacity of signatures to identify CRCs from biallelic *MUTYH* carriers. Our analysis showed that a CRC with a combined SBS18 and SBS36 proportion of >23% or <9% has a >99% or <1% likelihood, respectively, of having a biallelic defect in *MUTYH* (**Figure 4c** and **Figure 4d**).

We applied these thresholds in two scenarios: 1) evaluating monoallelic carriers, and 2) classifying a VUS. The sum of SBS18 and SBS36 was evaluated in three CRCs from three monoallelic *MUTYH* PV carriers (M11, M13 and M14): both SBS18 and SBS36 were 0% for each of the three CRCs, suggesting that monoallelic *MUTYH* PVs are not related to defective BER. No identifiable second somatic “hit” (single nucleotide variant or loss of heterozygosity) in *MUTYH* was evident in any of the three CRCs (**Supplementary Figure 3**). We then calculated the combined SBS18 and SBS36 signatures for a CRC (M12) from a person who carried a heterozygous *MUTYH* c.1187G>A p.Gly396Asp PV and a heterozygous *MUTYH* c.912C>G p.Ser304Arg VUS [34]. The sum of SBS18 and SBS36 was 0.3%, (**Figure 4c** and **Figure 4d**) and therefore, according to our analysis of confirmed biallelic *MUTYH* variants, there is a <1% likelihood that this CRC has biallelic *MUTYH* inactivation. This further suggests that the c.912C>G p.Ser304Arg variant is not likely to be pathogenic or is *in cis* with the c.1187G>A p.Gly396Asp PV.

### Identifying a biallelic *NTHL1* carrier mutational signature in CRC

The value of SBS30 was significantly higher in the CRC from the biallelic *NTHL1* carrier (N01) compared with the rest of the non-*NTHL1* ACCFR CRCs (46.5% v. 0.4±1.4%;  $p=3\times 10^{-230}$ ) and compared with the TCGA tumours (46.5% v 0.0±2.5%;  $p=1\times 10^{-77}$ ; **Figure 2**). SBS23 and SBS42 were also significantly higher in the biallelic *NTHL1* CRC compared with the rest of the ACCFR CRCs ( $p=7\times 10^{-204}$  and  $p=2\times 10^{-12}$ , respectively; **Figure 2**). Forward selection identified SBS30 as the most effective mutational signature to discriminate the CRC from the biallelic *NTHL1* carrier from all other ACCFR CRCs in the study, achieving an AUC of 1.00, and a separation of 38.0% from the rest of the CRCs (**Table 2**, **Supplementary Table 4**), a result that showed a high degree of replication when the TCGA

tumours were utilised (Table 2), supporting the discriminatory strength of SBS30 for biallelic *NTHL1*.

Variant filtering settings were less critical for identifying the *NTHL1* carrier N01 (**Figure 5a** and **Figure 5b**), with SBS30 exhibiting discriminatory power at VAF thresholds between 0.05 and 0.375, and all measured DP thresholds. Using a VAF threshold of 0.1 and DP filter of 50, our analysis indicates that a CRC with a measured SBS30 value of >41% confers a likelihood of >99% that the tumour has a biallelic *NTHL1* defect. Similarly, if SBS30 is <38%, a biallelic *NTHL1* defect is <1% likely (**Figure 5c** and **Figure 5d**). The CRCs from the four monoallelic *NTHL1* PV carriers (N02, N03, N04 and N05) all exhibited an SBS30 value of 0%, suggesting these CRCs do not have defective BER related to *NTHL1*. No identifiable second somatic “hit” (single nucleotide variant or loss of heterozygosity) in *NTHL1* was evident in these four CRCs (**Supplementary Figure 3**).

### **Identifying a MMR gene (Lynch syndrome) carrier mutational signature in CRC**

We investigated the utility of previously reported signatures for identifying Lynch syndrome-related CRCs compared to MMRp CRCs and sporadic MMRd CRCs. The Lynch syndrome-related CRCs (L01-L14) showed significantly higher levels of SBS1, SBS15, SBS20, SBS21, ID2 and ID7 ( $p=5 \times 10^{-6}$ ,  $p=1 \times 10^{-7}$ ,  $p=1 \times 10^{-8}$ ,  $p=8 \times 10^{-10}$ ,  $p=7 \times 10^{-16}$ ,  $p=9 \times 10^{-10}$  respectively) compared with the ACCFR MMRp control CRCs (**Figure 2**). SBS6 was seen at high levels in the Lynch syndrome CRCs (17.8%  $\pm$  8.4%) but was not considered significantly different when compared with MMRp CRCs (8.4 $\pm$ 7.7%) after adjusting for multiple comparisons ( $p=0.0002$ ). When comparing Lynch syndrome-related CRCs (L01-L14) to the MMRd control group of CRCs (K01-K09), SBS1 showed the most significant difference between the groups (26.3 $\pm$ 8.7% v. 15.8 $\pm$ 9.8%,  $p=0.009$ ), however neither SBS1 nor any other signature were significantly different after adjustment for multiple comparisons (**Figure 2**).

When comparing the CRCs from *MLH1*, *MSH2* and *MSH6* PV carriers, no significant gene-specific difference in mutational signatures was found after multiple comparison adjustment (**Figure 3c** and **Figure 3d**). Signatures of interest were found to be consistent at VAF

thresholds between 0.00 and 0.15, and DP thresholds between 10 and 150 (**Figure 6, 7, Supplementary Figure 2**).

To first investigate a common molecular stratification in CRC, we applied forward selection to discriminate MMRd CRC (L01-L14 and K01-K09 CRCs) from all MMRp CRCs (C01-C18, M01-M14, N01-N05) in this study. This identified ID2, ID7, and SBS15 as the most informative combination of signatures, achieving an AUC of 1.00, and separation of 4.1pp between the groups (**Table 2**). We then applied forward selection to discriminate Lynch syndrome-related CRCs (L01-L14) from all MMRp CRCs in this study, identifying ID2, ID7, SBS1, and SBS15 as the most informative combination of signatures, achieving an AUC of 1.00, and separation of 33.2pp between the groups (**Table 2, Figure 3d**), a result that showed a high degree of replication when the TCGA MMRp controls were utilised (**Table 2, Figure 3d**). When considering the sum of ID2, ID7, SBS1 and SBS15, the likelihood of a Lynch syndrome-related CRC relative to a MMRp CRC is >99% and <1% at values of >105% and <76% (**Figure 7a** and **Figure 7b**).

A common diagnostic challenge for MMRd CRC is to differentiate inherited (Lynch syndrome) from sporadic MMRd CRC. Forward selection showed no significant (adjusted  $P < 0.05$ ) mutational signature. SBS1 was the best performing signature that could discriminate Lynch syndrome-related CRCs (L01-L14) from the MMRd control CRCs (K01-K09) in this study. However, SBS1 only achieved an AUC of 0.76 and the groups overlap by 23% (**Table 2**). This result did not improve when a larger group of TCGA MMRd controls (n=26) were utilised (**Table 2**). Consequently, the Lynch syndrome and sporadic MMRd CRCs could not be separated with high confidence (**Figure 7c** and **Figure 7d**).

**Table 2.** Individual mutational signatures identified to be associated with a hereditary CRC syndrome from the analysis of 60 CRCs. Each signature with an AUC>0.90 and mean difference >0.10 was included in the forward selection analysis. The best combination of signatures was determined using forward selection and adding signatures with the highest AUC, margin, and mean difference. Discrimination results with the ACCFR MMRp and MMRd control groups replaced with TCGA MMRp and MMRd controls to assess validation against a different set of tumours.

| Comparison                                        | Signatures                   | AUC          | LD or Grubbs   | Margin        | Mean Diff    | p-value         |
|---------------------------------------------------|------------------------------|--------------|----------------|---------------|--------------|-----------------|
| <i>MUTYH</i> Biallelic v. all other               | SBS18                        | 0.992        | 1.732          | -0.040        | 0.200        | 1.3E-12         |
| M01-M10 v. M11-M14 N K L C                        | SBS36                        | 0.948        | 2.649          | -0.019        | 0.254        | 2.6E-16         |
|                                                   | <b>SBS18, SBS36</b>          | <b>1.000</b> | <b>13.400</b>  | <b>0.090</b>  | <b>0.454</b> | <b>5.3E-32</b>  |
| <i>M01-M10 v. M11-M14 N L TCGA-MMRp TCGA-MMRd</i> | <i>SBS18, SBS36</i>          | <i>0.968</i> | <i>5.071</i>   | <i>-0.270</i> | <i>0.389</i> | <i>1.0E-56</i>  |
|                                                   | SBS30                        | 1.000        | 560.054        | 0.379         | 0.461        | 7.0E-246        |
| <i>NTHL1</i> Biallelic v. all other               | ID1                          | 0.966        | 2.915          | -0.071        | 0.131        | 7.9E-03         |
| N01 v. N02-N05 M K L C                            | ID12                         | 0.932        | 1.620          | -0.141        | 0.194        | 3.6E-02         |
|                                                   | <b>SBS30</b>                 | <b>1.000</b> | <b>560.054</b> | <b>0.379</b>  | <b>0.461</b> | <b>7.0E-246</b> |
| <i>N01 v. N02-N05 M L TCGA-MMRp TCGA-MMRd</i>     | <i>SBS30</i>                 | <i>1.000</i> | <i>98.561</i>  | <i>0.098</i>  | <i>0.503</i> | <i>4.4E-45</i>  |
|                                                   | ID2                          | 0.997        | 7.554          | -0.074        | 0.406        | 1.68E-20        |
| MMRd v. MMRp                                      | ID7                          | 0.976        | 1.993          | -0.114        | 0.155        | 9.71E-12        |
| L K v. M N C                                      | SBS15                        | 0.907        | 1.070          | -0.107        | 0.196        | 4.02E-08        |
|                                                   | <b>ID2, ID7, SBS15</b>       | <b>1.000</b> | <b>9.423</b>   | <b>0.041</b>  | <b>0.756</b> | <b>1.58E-24</b> |
| <i>L TCGA-MMRd v. M N TCGA-MMRp</i>               | <i>ID2, ID7, SBS15</i>       | <i>0.994</i> | <i>13.426</i>  | <i>-0.289</i> | <i>0.953</i> | <i>6.20E-87</i> |
|                                                   | ID2                          | 0.996        | 7.456          | -0.074        | 0.414        | 6.9E-16         |
| Lynch v. MMRp                                     | ID7                          | 0.975        | 1.644          | -0.114        | 0.158        | 8.8E-10         |
| L v. M N C                                        | <b>ID2, ID7, SBS15, SBS1</b> | <b>1.000</b> | <b>17.147</b>  | <b>0.332</b>  | <b>0.873</b> | <b>1.1E-23</b>  |
| <i>L v. M N TCGA-MMRp</i>                         | <i>ID2, ID7, SBS15, SBS1</i> | <i>0.991</i> | <i>13.270</i>  | <i>-0.367</i> | <i>0.919</i> | <i>3.4E-39</i>  |
| Lynch v. <i>MLH1</i> methylated                   | SBS1                         | 0.762        | 0.635          | -0.228        | 0.105        | 9.3E-03         |
| L v. K                                            | <b>SBS1</b>                  | <b>0.762</b> | <b>0.635</b>   | <b>-0.228</b> | <b>0.105</b> | <b>9.3E-03</b>  |
| <i>L v. TCGA-MMRd</i>                             | <i>SBS1</i>                  | <i>0.683</i> | <i>0.208</i>   | <i>-0.368</i> | <i>0.060</i> | <i>2.7E-02</i>  |

M= MMRp CRCs from ACCFR that are from biallelic *MUTYH* PV carriers (M01-M10) or from monoallelic *MUTYH* PV carriers (M11, M13, M14) or monoallelic *MUTYH* PV and VUS carrier (M12).

N= MMRp CRCs from ACCFR that are from biallelic *NTHL1* PV carrier (N01) or from monoallelic *NTHL1* PV carriers (N02-N05).

L= MMRd CRCs from the ACCFR from people with *MLH1*, *MSH2* or *MSH6* gene mutations (Lynch syndrome; L1-L14)

K= MMRd control CRCs from the ACCFR with evidence of *MLH1* gene promoter hypermethylation (K1-K9)

C= MMRp control CRCs from the ACCFR (C1-C18)

## DISCUSSION

In this study, we compared mutational signature profiles in CRCs from carriers of PVs in CRC and polyposis susceptibility genes with those in CRCs from individuals who did not carry a PV in one of these genes. Germline PVs in the DNA MMR genes and biallelic PVs in the *MUTYH* and *NTHL1* genes result in a high risk of developing CRC and other extra-colonic cancers [8,9,35], highlighting the importance of identifying carriers [3,7]. Our analysis identified multiple SBS and/or ID signatures that were associated with each syndromic CRC, supporting germline inactivation of the DNA MMR and BER pathways as key drivers of CRC tumorigenesis. The sum of SBS18 and SBS36 provided the most effective combination to differentiate CRCs from biallelic *MUTYH* carriers from CRCs from non-carriers. The CRC from a biallelic *NTHL1* carrier demonstrated significantly increased proportions of SBS23, SBS30 and SBS42 compared with CRCs from non-carriers, however, the presence of SBS30 at >41% was sufficient to provide >99% likelihood that a CRC had developed in a person with biallelic inactivation of the *NTHL1* gene. These findings support previous observations of the significance of SBS30 in biallelic *NTHL1* deficient tumours [3,7,36]. CRCs that developed in MMR PV carriers (Lynch syndrome) could be effectively differentiated from sporadic MMR-proficient CRC by a combination of signatures (ID2, ID7, SBS1 and SBS15), but signatures were less effective at discriminating Lynch syndrome-related CRC from sporadic MMR-deficient CRC resulting from *MLH1* gene promoter hypermethylation (SBS1: AUC=76%). These findings were consistent when assessed against the larger TCGA MMRp and MMRd tumours, highlighting the robustness of these findings and the utility of deriving mutational signatures from CRCs to identify carriers of PVs in MMR, *MUTYH* and *NTHL1* genes.

SBS18 and SBS36 were individually associated with CRCs from biallelic *MUTYH* carriers in our cohort, but neither signature alone completely separated the carriers from the non-*MUTYH* CRCs. Combining SBS18 and SBS36 resulted in a 9.0pp separation from the non-*MUTYH* carrier CRCs. This was also observed for the Lynch syndrome-related CRCs where the combination of ID2, ID7, SBS15 and SBS1 resulted in a 33.2pp separation from the MMRp CRCs, while each individually associated signature alone overlapped with the MMRp CRCs, highlighting the benefit of combining signatures for improved discrimination.



This study confirms previous reports of the association of SBS18 and SBS36 with CRCs from biallelic *MUTYH* carriers [21,22]. In addition, we observed significant differences between individual signatures and the underlying germline *MUTYH* PV. TMB in CRCs from p.Tyr179Cys PV carriers was also significantly elevated relative to the p.Gly396Asp PV carriers ( $p=0.0054$ ) and to the MMRp controls ( $p=0.019$ ), suggesting that the underlying germline mutation may have implications for immunotherapy-based treatment of CRC in these carriers. The reason for the observed differences by specific mutation is not yet known but it is possible that disruption of different functional domains (p.Tyr179Cys: N-terminal domain; p.Gly396Asp: C-terminal domain) may result in different somatic mutations and mutational spectrum. It remains to be determined if the signature composition will differ for carriers of *MUTYH* PVs other than the two common European PVs.

Monoallelic *MUTYH* PV carriers are reported to have an increased risk of CRC [27,37]. A previous study identified high levels of SBS18 in the CRCs from two monoallelic germline *MUTYH* PV carriers where loss of the wildtype allele was observed in the tumour [21]. In this study, SBS18 and/or SBS36 were not increased in the CRCs from the three monoallelic *MUTYH* carriers, nor did we find evidence of a second somatic hit in their CRCs. In addition, none of the CRCs from four monoallelic *NTHL1* PV carriers exhibited SBS30. Our findings support the notion that biallelic *MUTYH* or *NTHL1* inactivation is necessary to promote BER deficiency-related CRC tumorigenesis. This approach could be applied to rare variant classification, including VUSs. We explored this in a CRC (M12) from a carrier of a *MUTYH* PV (p.Gly396Asp) and a VUS (p.Ser304Arg). The absence of both SBS18 and SBS36 suggests that this VUS is not pathogenic and could be further supported by exclusion of the variant being *in cis* with the p.Gly396Asp PV through parent genotyping.

The current proposed mechanism for the accumulation of MMRd associated somatic mutations is based on polymerase slippage, particularly during replication of low complexity regions such as homopolymers, followed by defective repair of these errors [38]. The result is MSI, a phenomenon associated with Lynch syndrome. Our results reflect this underlying molecular mechanism, showing that ID signatures more effectively identify MMRd samples compared to SBS signatures. The most relevant signatures, ID2 and ID7, are primarily composed of 1bp homopolymer deletions, which corresponds to the expected aetiology. We



demonstrated that mutational signatures were able to differentiate MMRd CRC from MMRp CRC, a feat that is currently achieved by MMR immunohistochemistry and is recommended to be performed on all newly diagnosed CRCs to screen for Lynch syndrome-associated CRC [10]. As tumour sequencing becomes more widely implemented, calculating signatures on CRCs could supersede the need for MMR immunohistochemistry. When comparing Lynch syndrome MMRd CRCs (L01-L14) to the CRCs from the MMRd control group (K01-K09), SBS1 had the greatest capacity to separate the two groups, but was not significant after adjusting for multiple comparisons (AUC 76%;  $p=0.009$ ). From our analysis we find that the current mutational signature framework cannot completely differentiate Lynch syndrome CRCs from *MLH1* methylated CRCs. Investigating novel approaches to derive mutational signatures that are focused on differentiating these two important MMRd subtypes may provide a better discrimination tool.

We assessed the robustness of mutational signatures to changes in variant filtering settings. Our results demonstrated that filtering VAF and DP too leniently (increased artefacts) or too stringently (reduced number of variants) resulted in substantial changes to the signature proportions, including loss of the hereditary CRC-associated signatures in the CRC. In our study, a minimum VAF threshold from 0.05 to 0.2 and minimum DP threshold from 25 to 100 resulted in stable somatic mutation counts and consequently increased robustness of the hereditary CRC-associated signatures. To overcome a potential limitation of selecting a set of fixed optimal filtering settings we generated progression graphs that illustrate the robustness of a tumour's signature profile across different filtering settings (**Figure 4a, 4b, 5a, 5b, 6a-f**), providing a visual confirmation of a single tumour's signature robustness when compared to presenting a tumour's profile as a "mutograph" (**Figure 1**). Although this approach demands increased computational requirements, this may resolve ambiguous cases, and reduces the likelihood of artefacts arising due to signature calculation at a single, potentially arbitrary, filtering threshold.

This study has some limitations. Only a single biallelic *NTHL1* carrier was included in the study. This CRC showed relatively high levels of SBS23, SBS30 and SBS42. SBS30 and SBS23 were previously identified in tumours from biallelic *NTHL1* carriers adding support to our findings [7]. SBS42 was not identified previously in this context as it was not part of the

previous version of signatures and therefore could not be reported. Doublet signatures were excluded from this study due to low numbers in WES data, and high reconstruction error. This study used pre-existing COSMIC signature definitions from which to generate mutational signatures for each CRC, rather than creating novel signatures specific for our cohort. The advantage of this approach is the existing associated phenotypes provided for the COSMIC definitions, but unrelated signatures are included in the calculation, which may result in reporting spurious signatures. Analysis of an independent set of syndromic and non-syndromic CRCs is needed to validate our findings.

## CONCLUSIONS

Understanding the somatic mutational landscape can enhance precision oncology by enabling us to pinpoint biomarkers relevant to targeted treatment [39]. As access to tumour sequencing increases, the opportunity to derive mutational signatures, at minimal additional cost, can provide improved diagnostic yield and guide therapeutic options [23]. We have shown that CRCs from biallelic *MUTYH* carriers and from biallelic *NTHL1* carriers exhibit mutational signature profiles that distinguish them from CRCs from non-carriers, evidenced by the combination of SBS18 and SBS36, and by SBS30, respectively. These distinct mutational signature profiles have the potential to aid in rare variant classification for these genes. Furthermore, we identified a novel association between both the proportion of SBS18 and SBS36 and the TMB for specific *MUTYH* PVs. Our results highlight the additional utility of ID-derived signatures for determining defective DNA MMR where the combination of ID2 and ID7 with SBS1 and SBS15 effectively differentiated Lynch syndrome CRCs from MMRp CRCs. We have shown that mutational signatures generated from WES of FFPE-CRCs can effectively identify carriers of hereditary CRC and polyposis syndromes and provides a functional assay to aid in the clinical genetics of CRC. Further work is needed to distinguish germline MMR-deficiency from somatic MMR-deficiency in order to improve the diagnosis of Lynch syndrome.

**Funding/Support:** Funding by a National Health and Medical Research Council of Australia (NHMRC) project grant 1125269 (PI- Daniel Buchanan), supported the design, analysis and

interpretation of data. DDB is supported by a NHMRC R.D. Wright Career Development Fellowship and funding from the University of Melbourne Research at Melbourne Accelerator Program (R@MAP). PG is supported by an Australian Government Research Training Program Scholarship. BP is supported by a Victorian Health and Medical Research Fellowship

Research reported in this publication was supported by the National Cancer Institute of the National Institutes of Health under Award Number U01CA167551 and through a cooperative agreement with the Australasian Colorectal Cancer Family Registry (NCI/NIH U01 CA074778 and U01/U24 CA097735) and by the Victorian Cancer Registry, Australia. This research was performed under CCFR approved projects C-AU-0818-01, C-AU-1014-02, C-AU-0312-01, C-AU-1013-02.

**Financial disclosure:** DDB served as a consultant on the Tumour Agnostic (dMMR) Advisory Board of Merck Sharp and Dohme in 2017 and 2018 for Pembrolizumab.

**Acknowledgments:** We thank members of the Colorectal Oncogenomics Group for their support of this manuscript. We thank the participants and staff from the Colon-CFR in particular, Maggie Angelakos, Samantha Fox and Allyson Templeton for their support of this manuscript. This research was undertaken using the LIEF HPC-GPGPU Facility hosted at the University of Melbourne. This Facility was established with the assistance of LIEF Grant LE170100200. We thank Melbourne Bioinformatics for their support of this work.

“The content of this manuscript does not necessarily reflect the views or policies of the National Cancer Institute or any of the collaborating centers in the Colon Cancer Family Registry (Colon-CFR), nor does mention of trade names, commercial products, or organizations imply endorsement by the US Government or the Colon-CFR.”

**Author contributions:** DDB, PG, MC and IMW conceived the original study concept and design and designed the analysis. CR, FAM, IMW, AKW, JLH, MAJ contributed to the acquisition of study data. The sample curation and laboratory testing was performed by MC,

RW, RH, JJ, SP, SJ, JC. PG, BJP, KM implemented the bioinformatics analysis pipeline software. PG and DDB prepared the manuscript. All authors provided critical revisions to the manuscript for important intellectual content and have read and approved of the final manuscript.

**Competing interests:** The authors declare no competing interests.

## Figures

**Figure 1.** Measured (a) SBS and (b) ID tumour mutational signatures (TMS) according to the COSMIC v3 signatures across the 60 CRCs tested by WES, grouped by subtype. Signatures with values below 5% in all samples are excluded.

**Figure 2.** Heatmap showing the mean  $\pm$  SD of each tumour mutational signature (TMS) that was significantly associated with a hereditary CRC syndrome when compared with the study matched MMRd and MMRp controls or when compared with the TCGA MMRd and MMRp controls. Associated signatures include both previously reported associations and significant novel associations (SBS23 and SBS42) discovered in this study. Red boxes highlight syndromes of interest and associated mutational signatures. SBS14, SBS26, and SBS44 have been reported to be associated with MMRd but were not significantly associated with Lynch syndrome related CRC in this study.

**Figure 3.** The investigation of gene and PV specific tumour mutational signatures (TMS): (a) The contribution of the biallelic *MUTYH*-associated signatures SBS18 and SBS36 to each of the 10 biallelic *MUTYH* related CRCs by their underlying germline PVs, (b) The mean of SBS18 was significantly higher in the 3 CRCs from homozygous p.Gly396Asp carriers (blue) compared with the 7 CRCs from homozygous or compound heterozygous carriers of the p.Tyr179Cys PV (green;  $p=0.015$ ). Conversely, the mean of SBS36 was significantly higher in the 7 CRCs from the p.Tyr179Cys carriers (green) compared with the 3 CRCs from the p.Gly396Asp carriers (blue;  $p=0.0012$ ); the combination of SBS18 and SBS36 effectively separates the biallelic *MUTYH* CRCs from both the MMRp and MMRd controls, and from the TCGA MMRp and MMRd controls, (c) The contribution of the Lynch syndrome-associated signatures for each of the 14 CRCs from the Lynch syndrome carriers by the germline MMR gene mutated, (d) The distribution of each of the Lynch syndrome-associated signatures for the 7 CRCs from *MLH1* carriers, 3 CRCs from *MSH2* carriers, and 4 CRCs from the *MSH6* carriers. No significant difference for any of the Lynch syndrome-associated signatures by MMR gene were observed after adjusting for multiple testing. The combination of ID2, ID7, SBS15, and SBS1 effectively separates Lynch syndrome CRCs from both the study matched MMRp controls and the TCGA MMRp controls.

**Figure 4.** Tumour mutational signature (TMS) assessment for *MUTYH*-biallelic CRCs. For a representative *MUTYH*-biallelic (M05), with minimum DP fixed at 50bp, *MUTYH*-associated polyposis specific signatures SBS18 and SBS36 are dominant at VAF thresholds between 0.075 and 0.25 (a), while SBS18 and SBS36 remain dominant at DP thresholds above 25bp when the VAF threshold is fixed at 0.1 (b). The sum of SBS18 and SBS36 varies depending on VAF, separating *MUTYH*-biallelic CRCs (light green) compared to monoallelic *MUTYH* (pink), MMRp controls (brown), and other CRCs (blue) when VAF lies between 0.075 and 0.175 (c) and when DP>25 (d). Calculated 99% (green) and 1% (red) probabilities reflect the likelihood that a sample above this level is *MUTYH*-biallelic.

**Figure 5.** Tumour mutational signature (TMS) assessment for the biallelic *NTHL1* CRC (N01) showing: (a) the proportions of each SBS-derived signature across changes in variant allele fraction (VAF) filtering in conjunction with the measured reconstruction error and number of somatic mutations, where SBS30 was stable between VAFs of 0.05 and 0.35, (b) the proportions of each SBS-derived signature across changes in DP in conjunction with the measured reconstruction error and number of somatic mutations, where SBS30 was stable at DP of >50 bp. The proportion of SBS30 across changes in VAF filtering (c) and DP (d) in the biallelic *NTHL1* CRC (dark green), monoallelic *NTHL1* CRCs (pink), MMRp controls (purple), and other CRCs (brown) where the proportion of SBS30 signature that gave 99% (green) and 1% (red) probability of observing a biallelic *NTHL1* CRC from all other CRCs studied.

**Figure 6.** Assessment of SBS and ID tumour mutational signatures (TMS) while varying the VAF threshold, for samples L01 (a, b), L04 (c, d), and L10 (e, f), representing tumours with germline PVs in *MSH2*, *MSH6*, and *MLH1* respectively. In all cases, ID signatures that have previously been associated with MMRd dominate at most VAF thresholds (b, d, f), while relevant SBS signatures are also present but less dominant, particularly at highly stringent settings (a, c, e).

**Figure 7.** The combination of SBS1, SBS15, ID2 and ID7 effectively separate Lynch syndrome CRCs (L01-L14) from all other MMRp samples at low AF thresholds (<0.125) and most DP thresholds (<150 bp) (a, b), but when separating Lynch syndrome CRCs from

MMRd controls (K01 to K09), mutational signatures do not effectively separate the two groups (c, d) at any filtering settings.

## Bibliography

- 1 Ferlay J, Colombet M, Soerjomataram I, *et al.* Estimating the global cancer incidence and mortality in 2018: GLOBOCAN sources and methods. *Int J Cancer* 2019;**144**:1941–53. doi:10.1002/ijc.31937
- 2 Al-Tassan N, Chmiel NH, Maynard J, *et al.* Inherited variants of MYH associated with somatic G:C-->T:A mutations in colorectal tumors. *Nat Genet* 2002;**30**:227–32. doi:10.1038/ng828
- 3 Weren RDA, Ligtenberg MJL, Kets CM, *et al.* A germline homozygous mutation in the base-excision repair gene NTHL1 causes adenomatous polyposis and colorectal cancer. *Nat Genet* 2015;**47**:668–71. doi:10.1038/ng.3287
- 4 Lorans M, Dow E, Macrae FA, *et al.* Update on hereditary colorectal cancer: improving the clinical utility of multigene panel testing. *Clin Colorectal Cancer* 2018;**17**:e293–305. doi:10.1016/j.clcc.2018.01.001
- 5 Win AK, Parry S, Parry B, *et al.* Risk of metachronous colon cancer following surgery for rectal cancer in mismatch repair gene mutation carriers. *Ann Surg Oncol* 2013;**20**:1829–36. doi:10.1245/s10434-012-2858-5
- 6 Win AK, Lindor NM, Young JP, *et al.* Risks of primary extracolonic cancers following colorectal cancer in lynch syndrome. *J Natl Cancer Inst* 2012;**104**:1363–72. doi:10.1093/jnci/djs351
- 7 Grolleman JE, de Voer RM, Elsayed FA, *et al.* Mutational Signature Analysis Reveals NTHL1 Deficiency to Cause a Multi-tumor Phenotype. *Cancer Cell* 2019;**35**:256–266.e5. doi:10.1016/j.ccell.2018.12.011
- 8 Win AK, Young JP, Lindor NM, *et al.* Colorectal and other cancer risks for carriers and noncarriers from families with a DNA mismatch repair gene mutation: a prospective cohort study. *J Clin Oncol* 2012;**30**:958–64. doi:10.1200/JCO.2011.39.5590
- 9 Win AK, Reece JC, Dowty JG, *et al.* Risk of extracolonic cancers for people with

- biallelic and monoallelic mutations in MUTYH. *Int J Cancer* 2016;**139**:1557–63.  
doi:10.1002/ijc.30197
- 10 Hegde M, Ferber M, Mao R, *et al.* ACMG technical standards and guidelines for genetic testing for inherited colorectal cancer (Lynch syndrome, familial adenomatous polyposis, and MYH-associated polyposis). *Genet Med* 2014;**16**:101–16. doi:10.1038/gim.2013.166
  - 11 Thompson BA, Goldgar DE, Paterson C, *et al.* A multifactorial likelihood model for MMR gene variant classification incorporating probabilities based on sequence bioinformatics and tumor characteristics: a report from the Colon Cancer Family Registry. *Hum Mutat* 2013;**34**:200–9. doi:10.1002/humu.22213
  - 12 Herman JG, Umar A, Polyak K, *et al.* Incidence and functional consequences of hMLH1 promoter hypermethylation in colorectal carcinoma. *Proc Natl Acad Sci USA* 1998;**95**:6870–5. doi:10.1073/pnas.95.12.6870
  - 13 Haraldsdottir S, Hampel H, Tomsic J, *et al.* Colon and endometrial cancers with mismatch repair deficiency can arise from somatic, rather than germline, mutations. *Gastroenterology* 2014;**147**:1308–1316.e1. doi:10.1053/j.gastro.2014.08.041
  - 14 Cleary SP, Cotterchio M, Jenkins MA, *et al.* Germline MutY human homologue mutations and colorectal cancer: a multisite case-control study. *Gastroenterology* 2009;**136**:1251–60. doi:10.1053/j.gastro.2008.12.050
  - 15 Thompson BA, Spurdle AB, Plazzer J-P, *et al.* Application of a 5-tiered scheme for standardized classification of 2,360 unique mismatch repair gene variants in the InSiGHT locus-specific database. *Nat Genet* 2014;**46**:107–15. doi:10.1038/ng.2854
  - 16 Ciriello G, Miller ML, Aksoy BA, *et al.* Emerging landscape of oncogenic signatures across human cancers. *Nat Genet* 2013;**45**:1127–33. doi:10.1038/ng.2762
  - 17 Goncarenco A, Rager SL, Li M, *et al.* Exploring background mutational processes to decipher cancer genetic heterogeneity. *Nucleic Acids Res* 2017;**45**:W514–22.  
doi:10.1093/nar/gkx367
  - 18 Alexandrov LB, Nik-Zainal S, Wedge DC, *et al.* Signatures of mutational processes in human cancer. *Nature* 2013;**500**:415–21. doi:10.1038/nature12477
  - 19 Alexandrov L, Kim J, Haradhvala NJ, *et al.* The repertoire of mutational signatures in human cancer. *BioRxiv* Published Online First: 15 May 2018. doi:10.1101/322859



- 20 Wellcome Sanger Institute. COSMIC Signatures of Mutational Processes in Human Cancer. Signatures of Mutational Processes in Human Cancer. 2019.<https://cancer.sanger.ac.uk/cosmic/signatures> (accessed 31 May2019).
- 21 Pilati C, Shinde J, Alexandrov LB, *et al.* Mutational signature analysis identifies MUTYH deficiency in colorectal cancers and adrenocortical carcinomas. *J Pathol* 2017;**242**:10–5. doi:10.1002/path.4880
- 22 Viel A, Bruselles A, Meccia E, *et al.* A Specific Mutational Signature Associated with DNA 8-Oxoguanine Persistence in MUTYH-defective Colorectal Cancer. *EBioMedicine* 2017;**20**:39–49. doi:10.1016/j.ebiom.2017.04.022
- 23 Van Hoeck A, Tjoonk NH, van Boxtel R, *et al.* Portrait of a cancer: mutational signature analyses for cancer diagnostics. *BMC Cancer* 2019;**19**:457. doi:10.1186/s12885-019-5677-2
- 24 Buchanan DD, Clendenning M, Zhuoer L, *et al.* Lack of evidence for germline RNF43 mutations in patients with serrated polyposis syndrome from a large multinational study. *Gut* 2017;**66**:1170–2. doi:10.1136/gutjnl-2016-312773
- 25 Newcomb PA, Baron J, Cotterchio M, *et al.* Colon Cancer Family Registry: an international resource for studies of the genetic epidemiology of colon cancer. *Cancer Epidemiol Biomarkers Prev* 2007;**16**:2331–43. doi:10.1158/1055-9965.EPI-07-0648
- 26 Jenkins MA, Win AK, Templeton AS, *et al.* Cohort profile: the colon cancer family registry cohort (CCFRC). *Int J Epidemiol* 2018;**47**:387–388i. doi:10.1093/ije/dyy006
- 27 Win AK, Cleary SP, Dowty JG, *et al.* Cancer risks for monoallelic MUTYH mutation carriers with a family history of colorectal cancer. *Int J Cancer* 2011;**129**:2256–62. doi:10.1002/ijc.25870
- 28 Buchanan DD, Clendenning M, Rosty C, *et al.* Tumor testing to identify lynch syndrome in two Australian colorectal cancer cohorts. *J Gastroenterol Hepatol* 2017;**32**:427–38. doi:10.1111/jgh.13468
- 29 Cancer Genome Atlas Network. Comprehensive molecular characterization of human colon and rectal cancer. *Nature* 2012;**487**:330–7. doi:10.1038/nature11252
- 30 Cortes-Ciriano I, Lee S, Park W-Y, *et al.* A molecular portrait of microsatellite instability across multiple cancers. *Nat Commun* 2017;**8**:15180. doi:10.1038/ncomms15180

- 31 Rosenthal R, McGranahan N, Herrero J, *et al.* DeconstructSigs: delineating mutational processes in single tumors distinguishes DNA repair deficiencies and patterns of carcinoma evolution. *Genome Biol* 2016;**17**:31. doi:10.1186/s13059-016-0893-4
- 32 Webb AR. *Statistical Pattern Recognition*. 2nd ed. West Sussex, England: : Wiley 2002.
- 33 Grubbs FE. Sample Criteria for Testing Outlying Observations. *Ann Math Statist* 1950;**21**:27–58. doi:10.1214/aoms/1177729885
- 34 VCV000230638.1 - ClinVar - NCBI. ClinVar - Genomic variation as it relates to human health. 2019.<https://www.ncbi.nlm.nih.gov/clinvar/variation/230638/> (accessed 11 Dec2019).
- 35 Møller P, Seppälä TT, Bernstein I, *et al.* Cancer risk and survival in path\_MMR carriers by gene and gender up to 75 years of age: a report from the Prospective Lynch Syndrome Database. *Gut* 2018;**67**:1306–16. doi:10.1136/gutjnl-2017-314057
- 36 Drost J, van Boxtel R, Blokzijl F, *et al.* Use of CRISPR-modified human stem cell organoids to study the origin of mutational signatures in cancer. *Science* 2017;**358**:234–8. doi:10.1126/science.aao3130
- 37 Win AK, Dowty JG, Cleary SP, *et al.* Risk of colorectal cancer for carriers of mutations in MUTYH, with and without a family history of cancer. *Gastroenterology* 2014;**146**:1208–11.e1. doi:10.1053/j.gastro.2014.01.022
- 38 Thibodeau SN, Bren G, Schaid D. Microsatellite instability in cancer of the proximal colon. *Science* 1993;**260**:816–9. doi:10.1126/science.8484122
- 39 Ma J, Setton J, Lee NY, *et al.* The therapeutic significance of mutational signatures from DNA repair deficiency in cancer. *Nat Commun* 2018;**9**:3292. doi:10.1038/s41467-018-05228-y

### TMS composition by CRC subtype

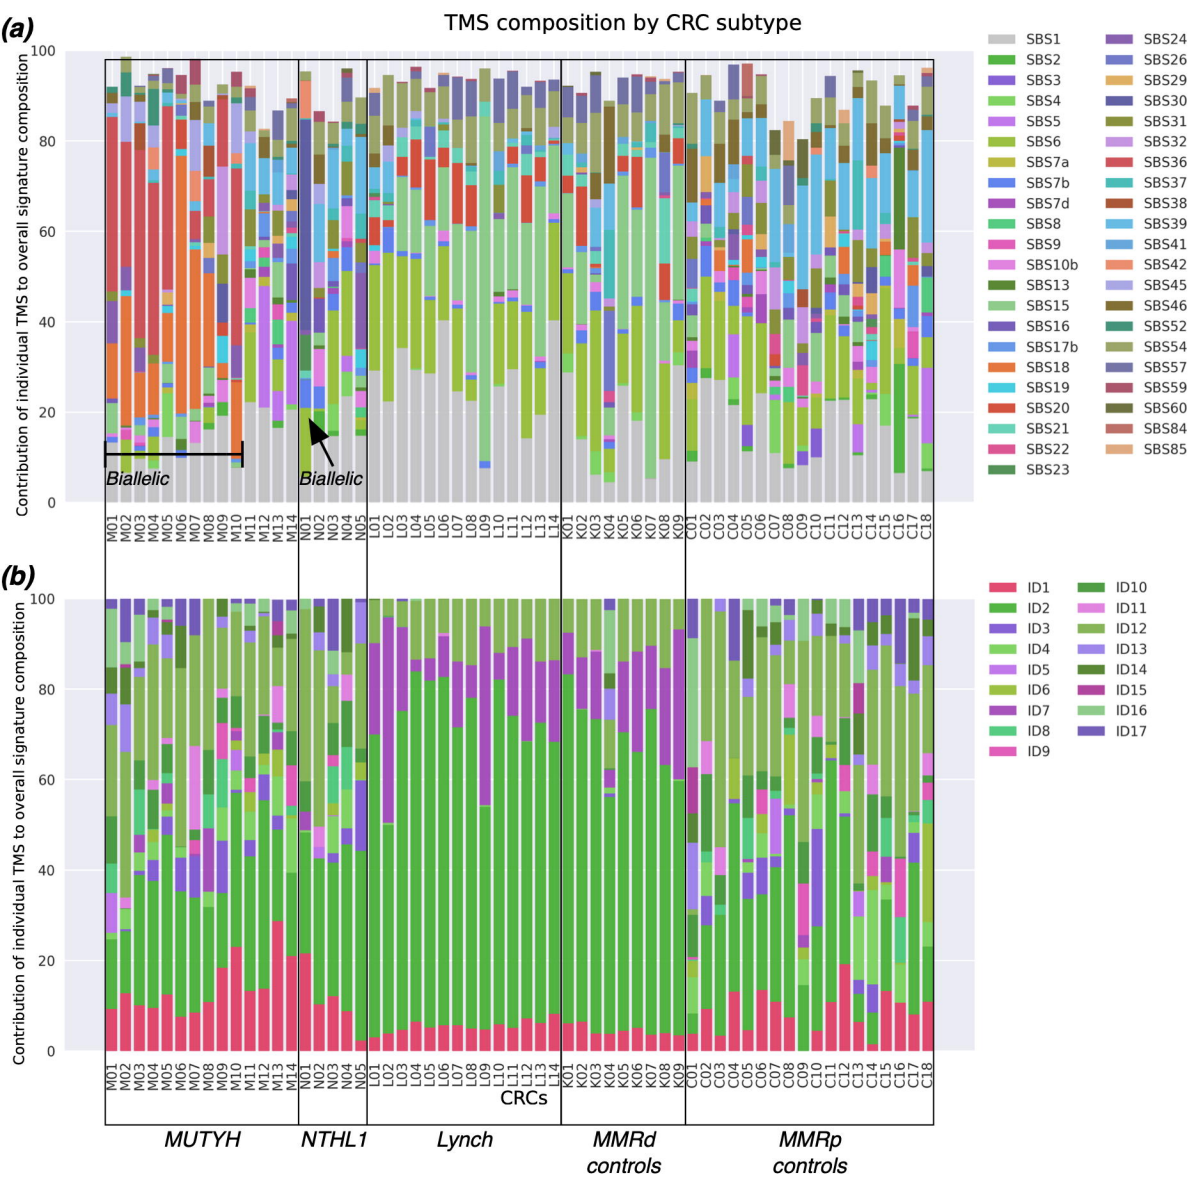

Mean  $\pm$  SD of TMS associated with subtypes of hereditary CRCs

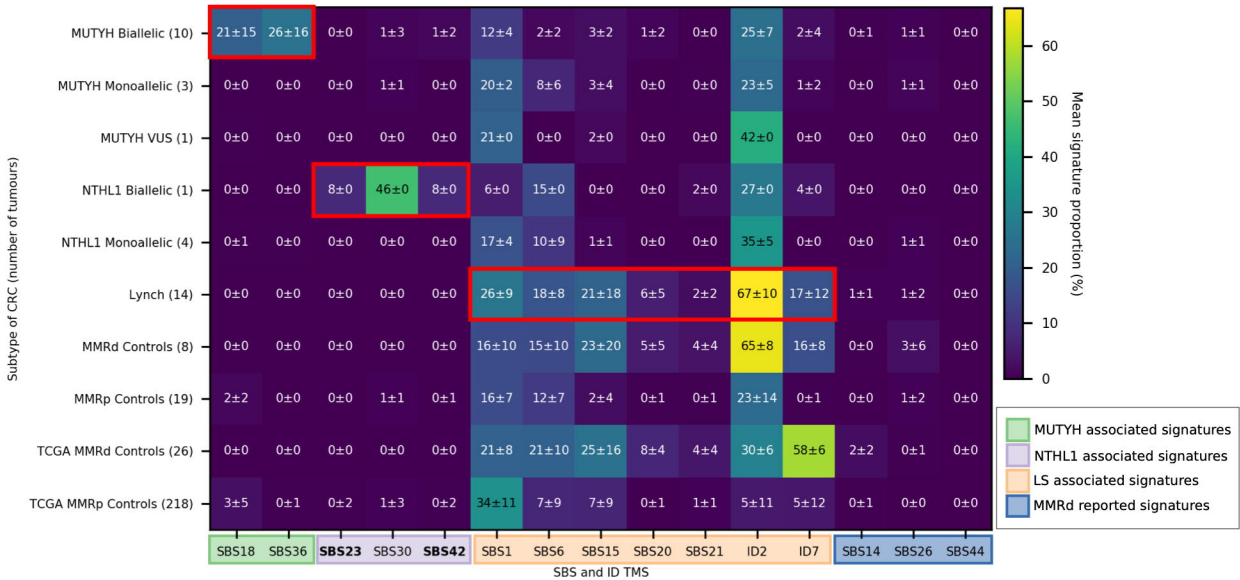

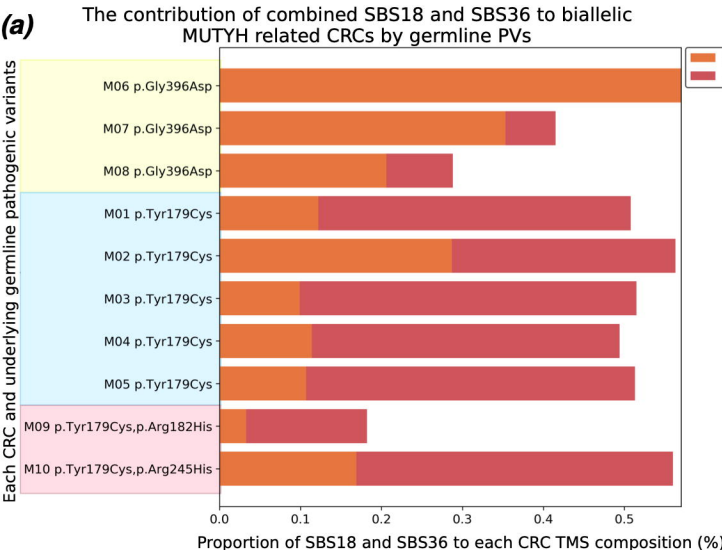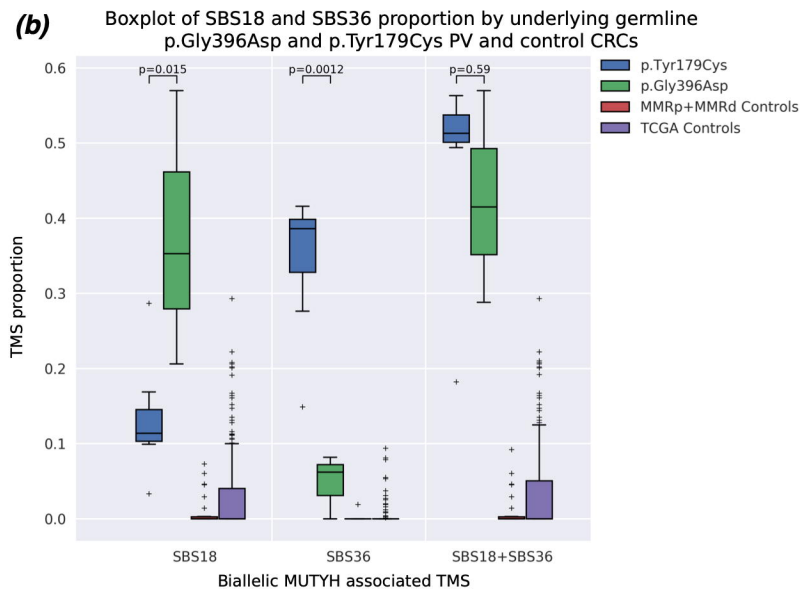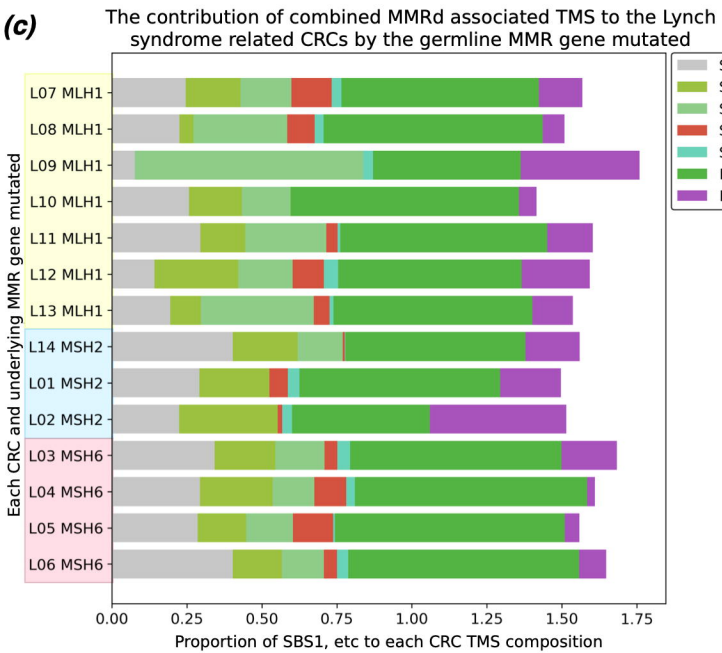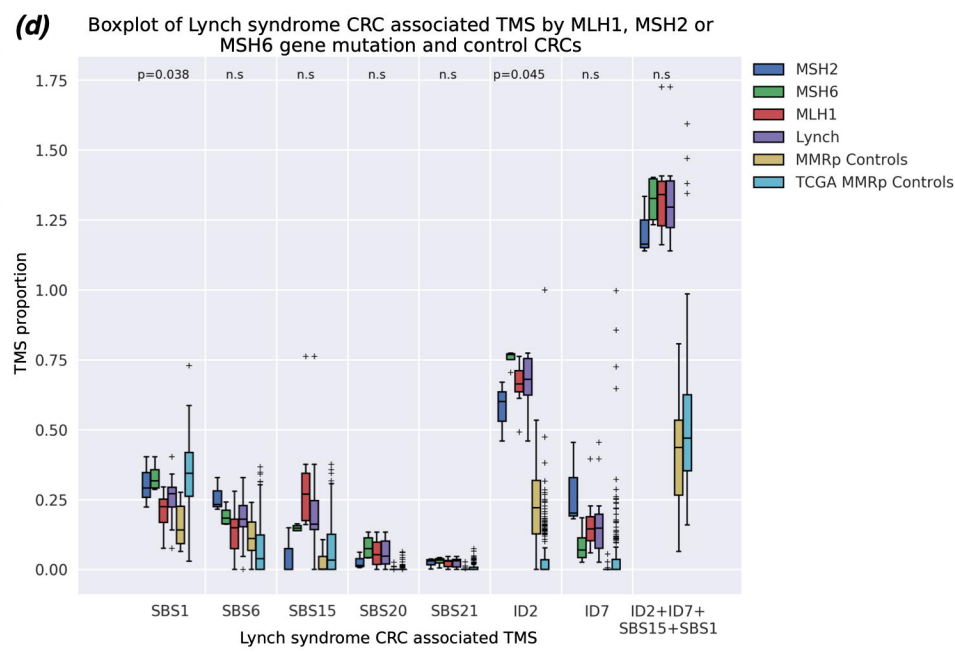

**(a)** TMS detected in *MUTYH* biallelic CRC M05 at varying allele fraction thresholds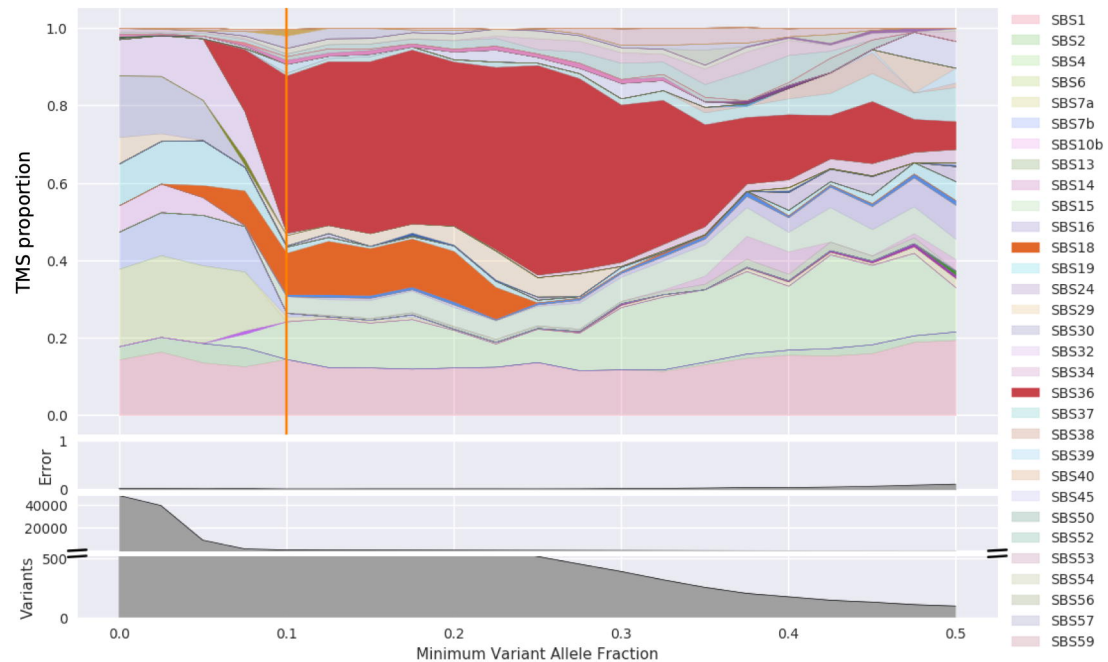**(b)** TMS detected in *MUTYH* biallelic CRC M05 at varying minimum depth thresholds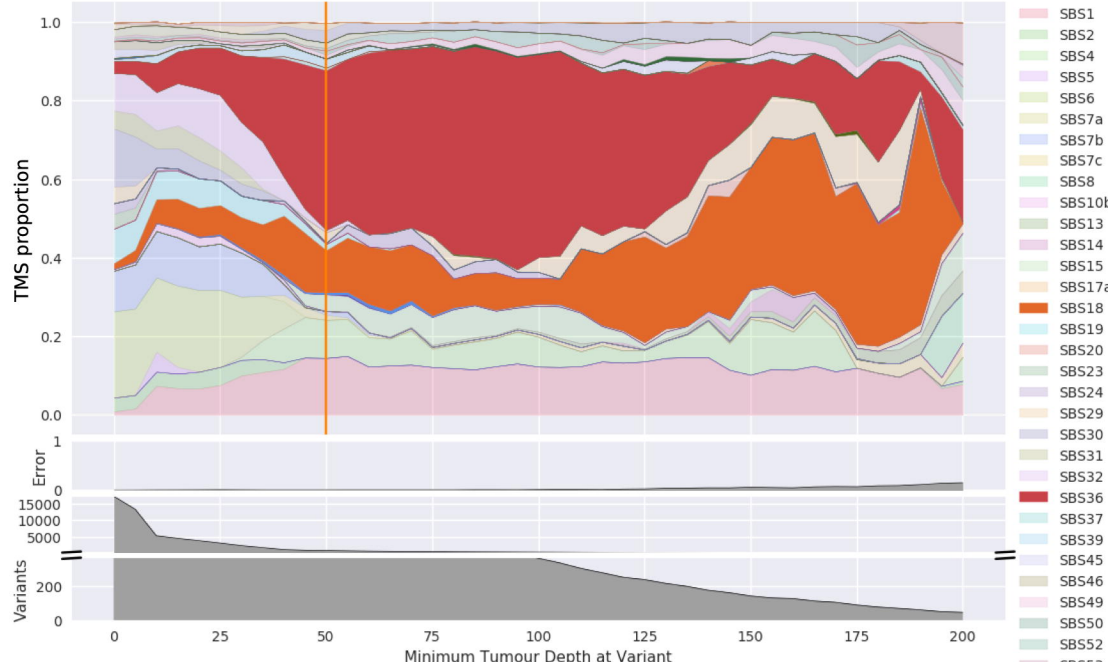**(c)** Comparing biallelic *MUTYH* CRC TMS with monoallelic, VUS, MMRp controls and other CRC syndromes across variable allele fraction cutoffs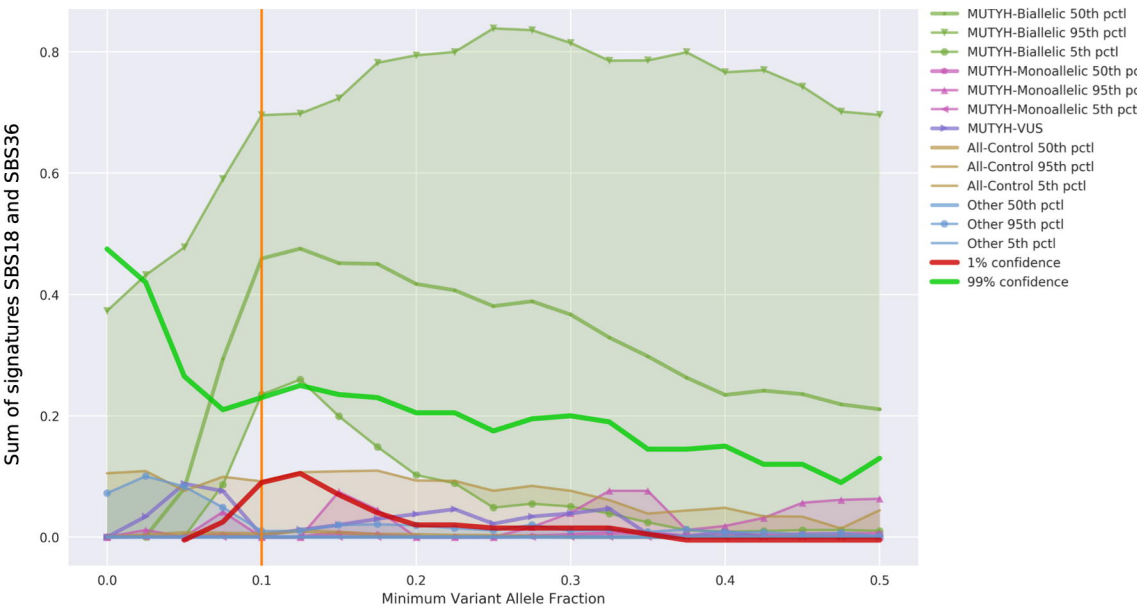**(d)** Comparing biallelic *MUTYH* CRC TMS with monoallelic, VUS, MMRp controls and other CRC syndromes across variable minimum depth cutoffs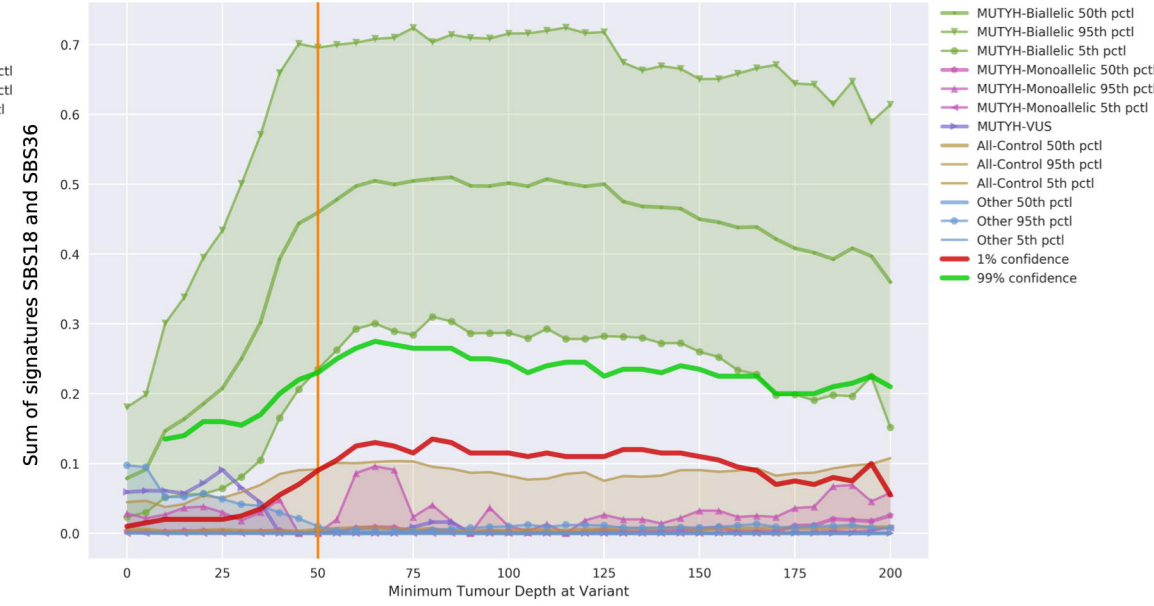



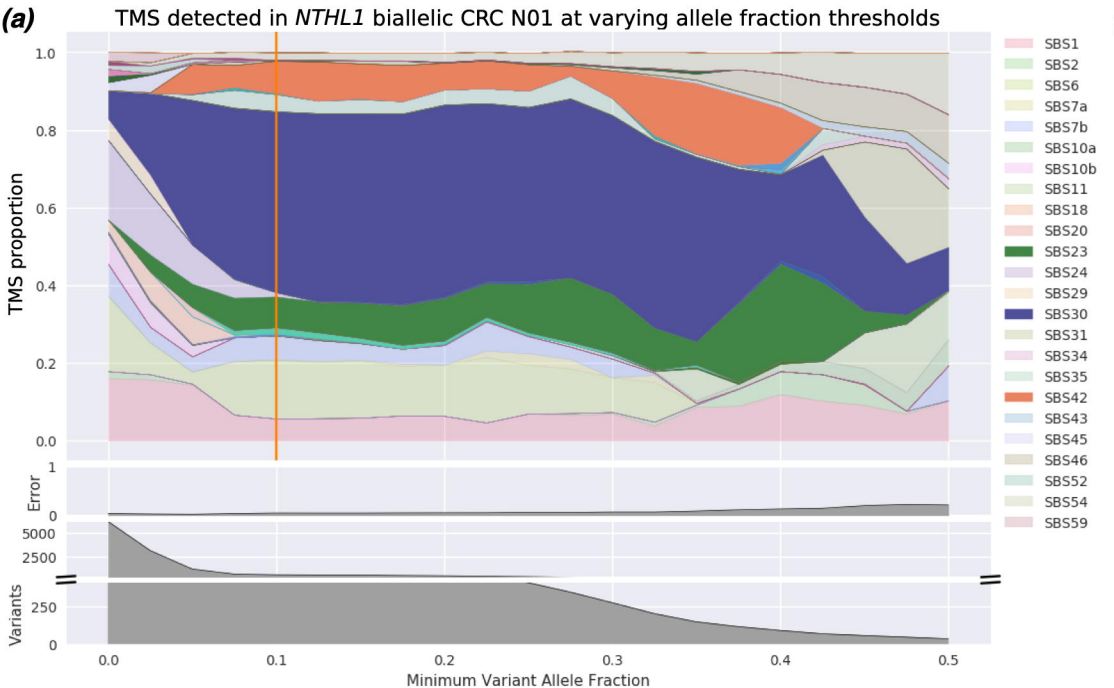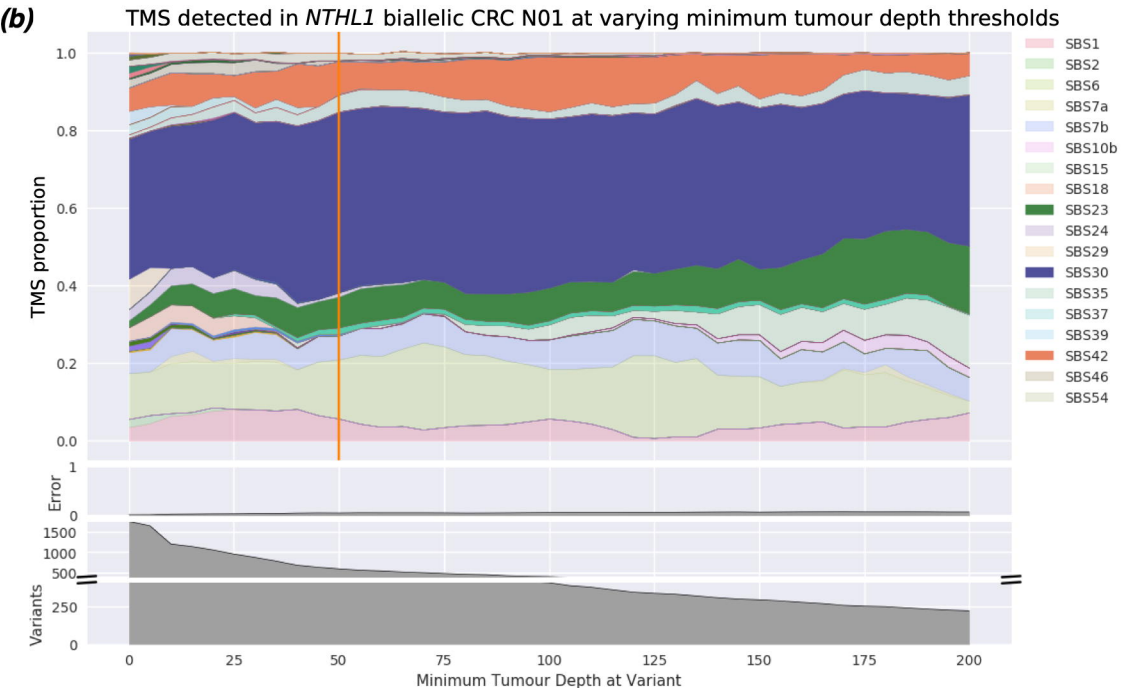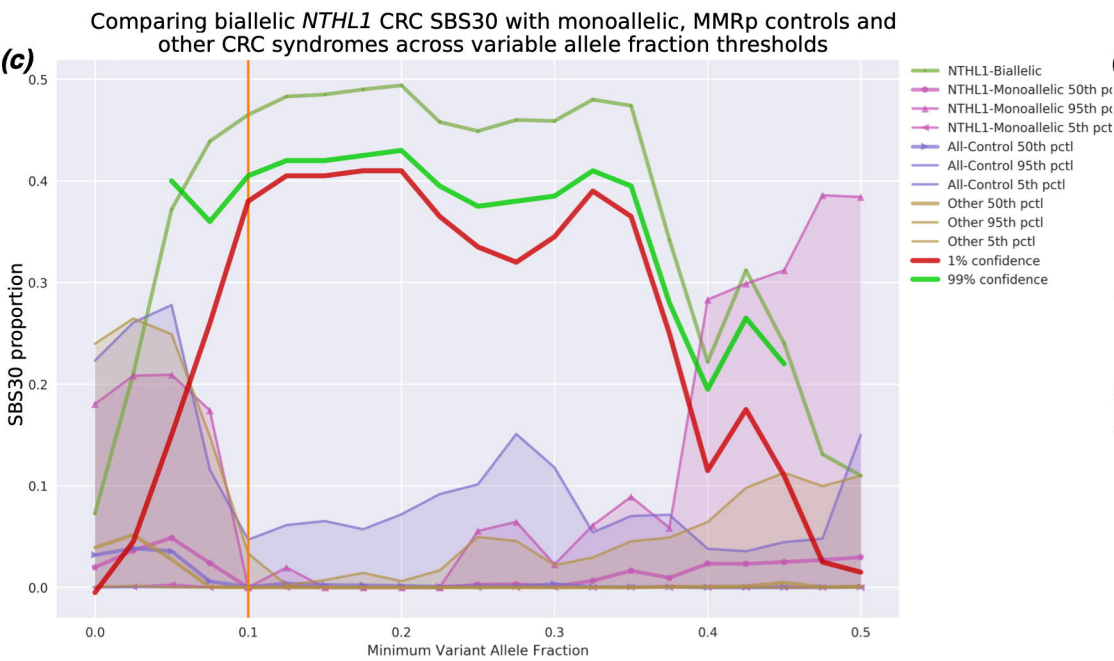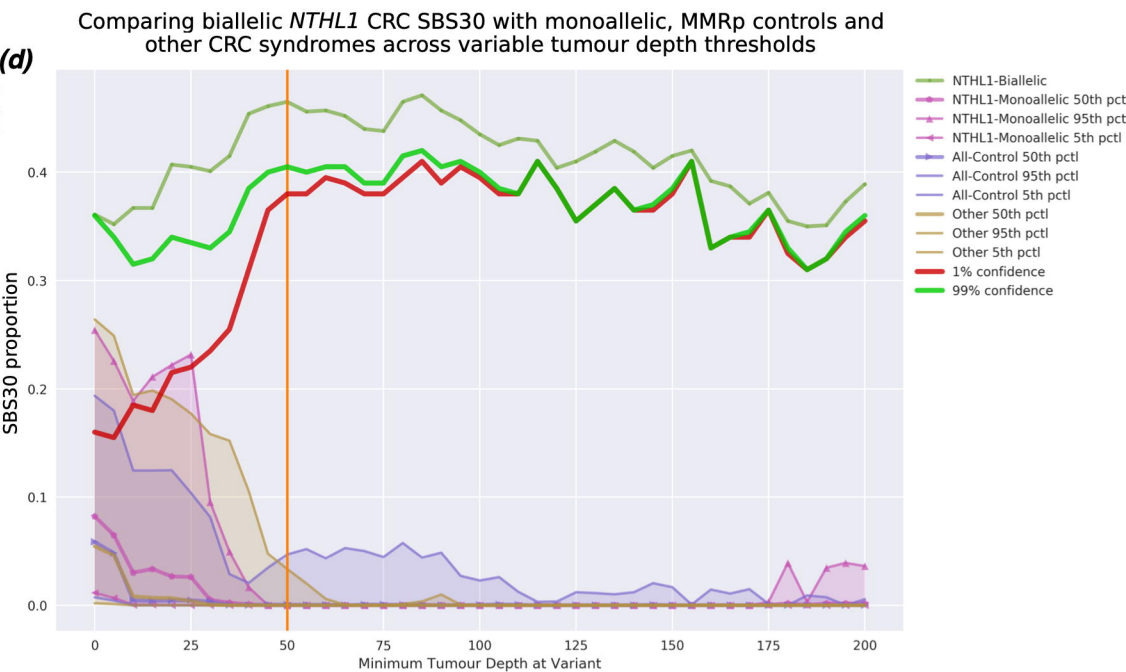

**(a)** SBS TMS detected in *MSH2* PV carrier L01 at varying minimum allele fraction thresholds

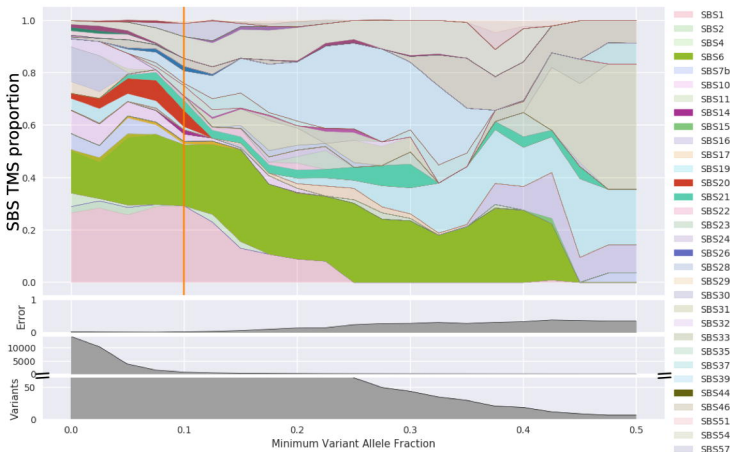

**(b)** ID TMS detected in *MSH2* PV carrier L01 at varying minimum allele fraction thresholds

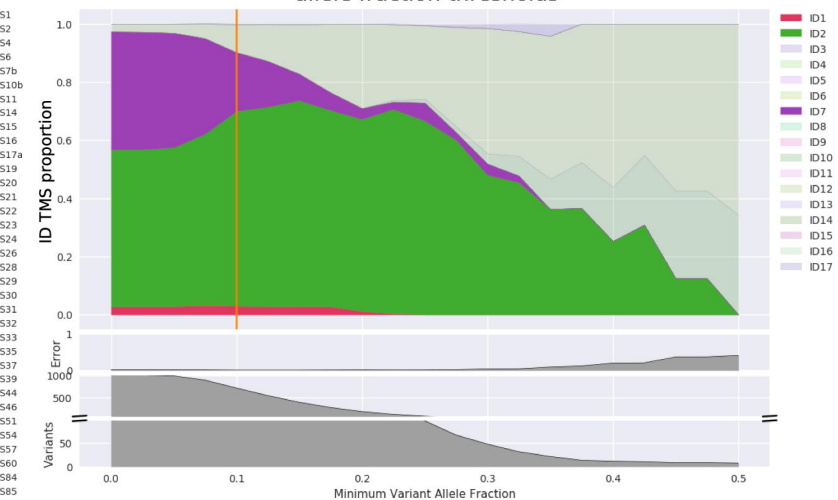

**(c)** SBS TMS detected in *MSH6* PV carrier L04 at varying minimum allele fraction thresholds

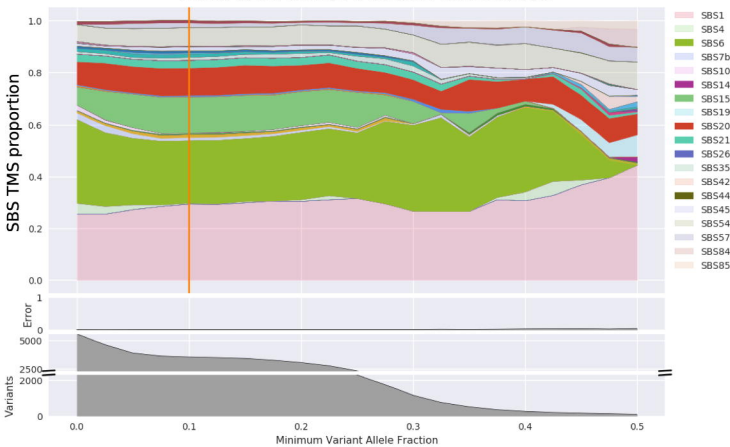

**(d)** ID TMS detected in *MSH6* PV carrier L04 at varying minimum allele fraction thresholds

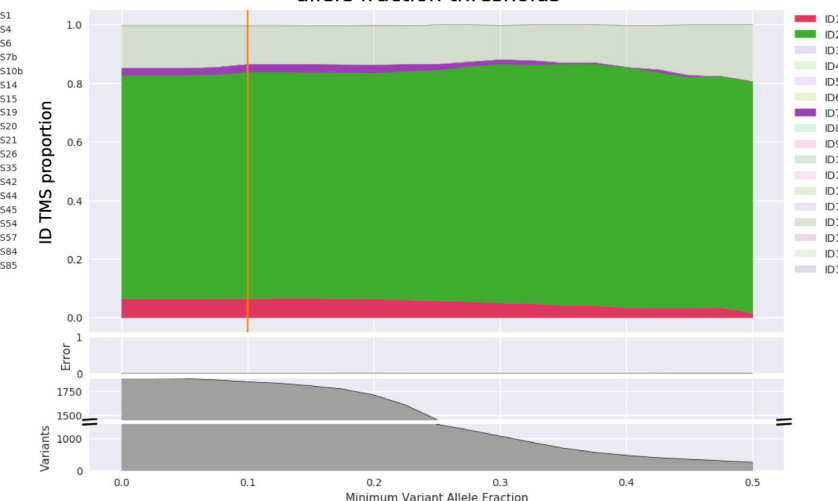

**(e)** SBS TMS detected in *MLH1* PV carrier L10 at varying minimum allele fraction thresholds

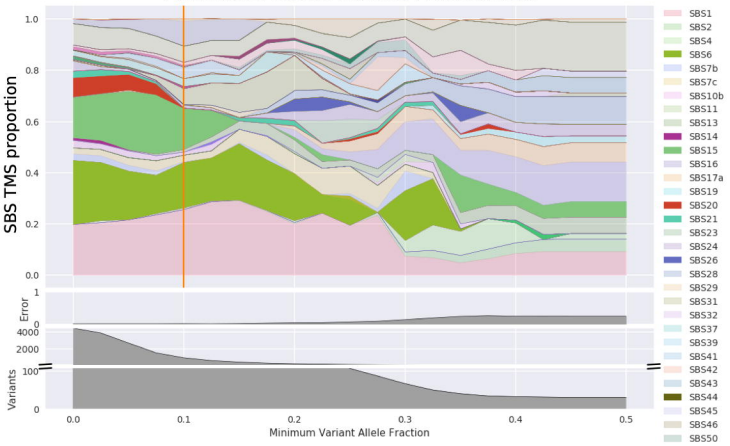

**(f)** ID TMS detected in *MLH1* PV carrier L10 at varying minimum allele fraction thresholds

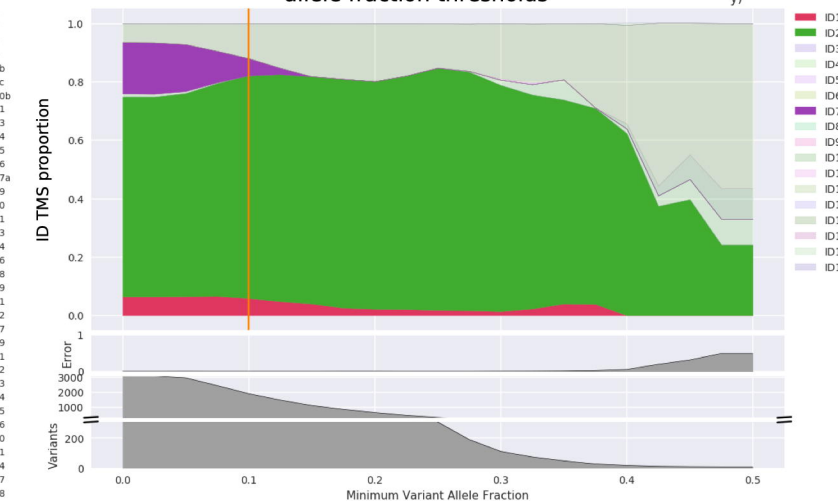



**(a)** Comparing LS with MMRp controls and other CRC syndromes across variable allele fraction thresholds

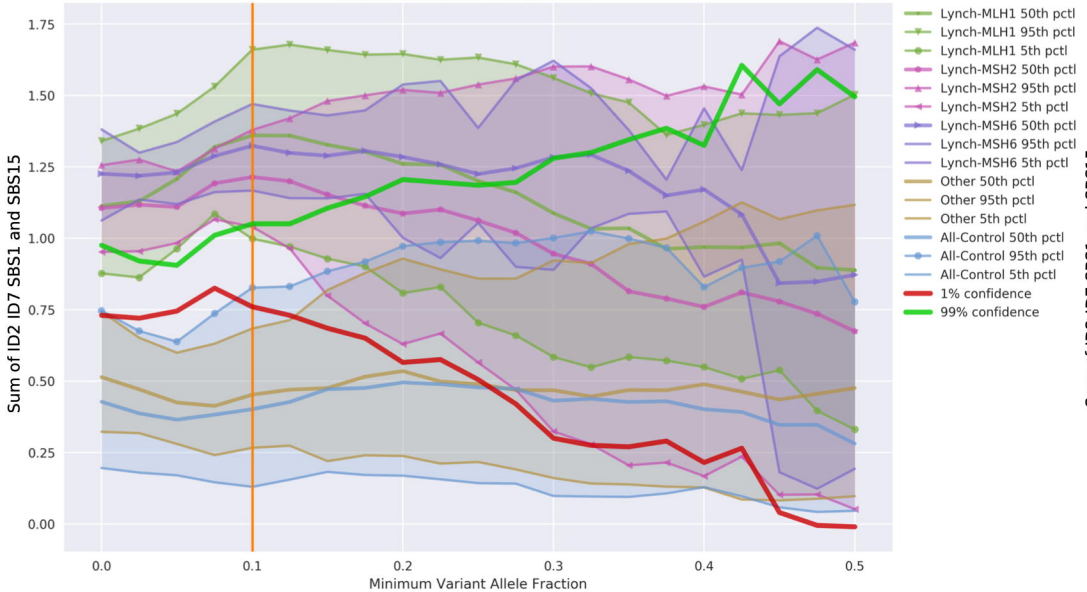

**(b)** Comparing LS with MMRp controls and other CRC syndromes across variable tumour depth thresholds

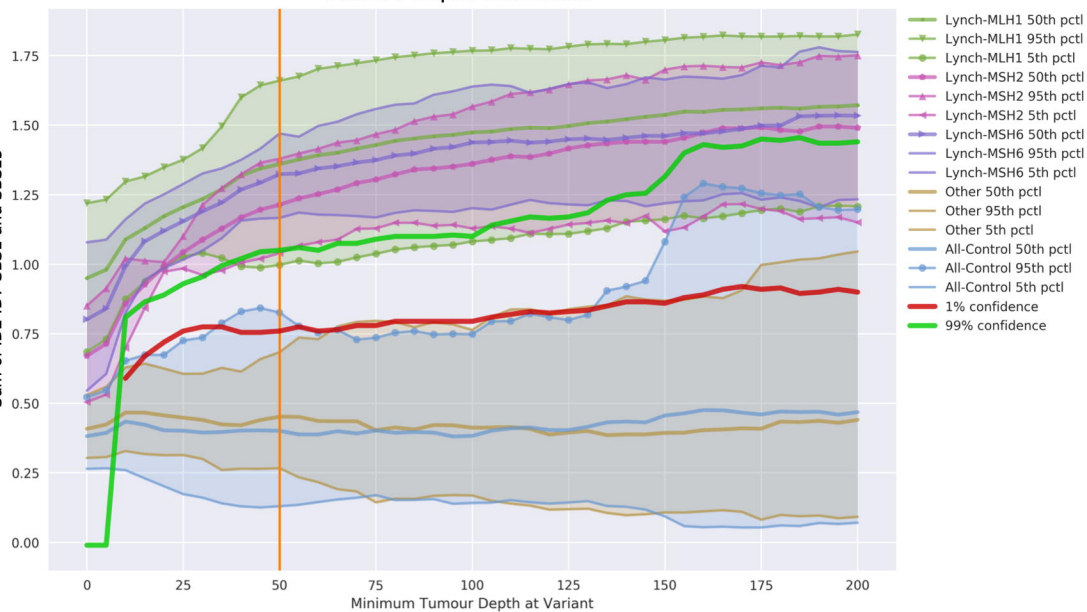

**(c)** Comparing LS with MMRd controls across variable allele fraction thresholds

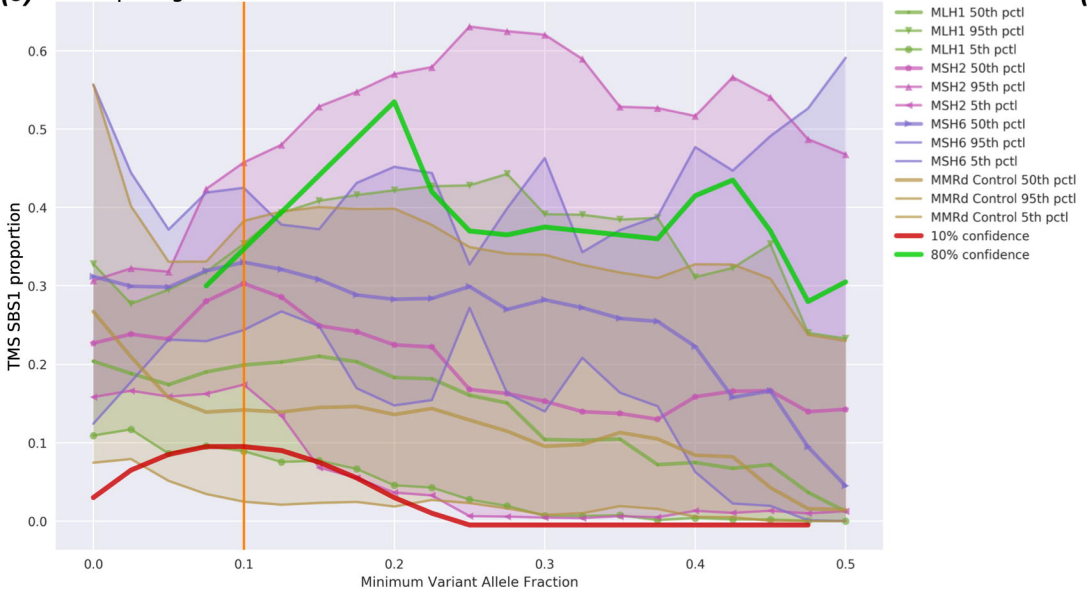

**(d)** Comparing LS with MMRd controls across variable tumour depth thresholds

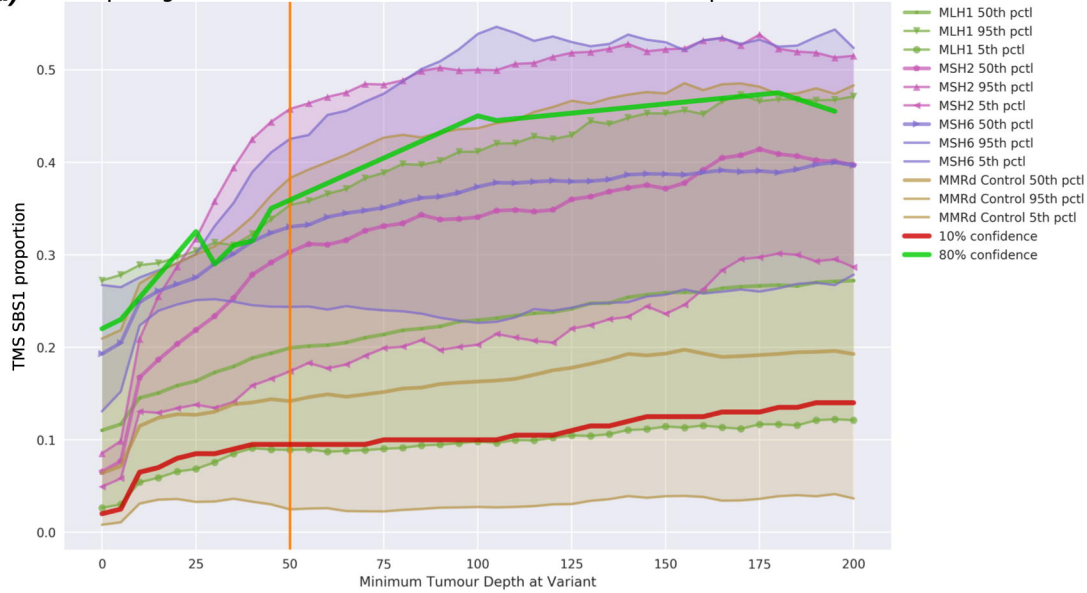

Source: https://medrxiv.org/content/10.1101/2019.12.11.19014597v2.full.pdf
